# Supplementary material
Source: publisher figshare collection journal article supplement (https://acs.figshare.com/ndownloader/files/4581379)

## Supplementary Material

Selectfluor-Mediated Dialkoxylation of Tungsten  $\eta^2$ -pyridinium ComplexesGeorge W. Kosturko,<sup>†</sup> Daniel P. Harrison,<sup>†</sup> Michal Sabat,<sup>†</sup> William H. Myers,<sup>‡</sup> W. Dean Harman<sup>†</sup><sup>†</sup>*Department of Chemistry, University of Virginia, Charlottesville, Virginia 22904 and*<sup>‡</sup>*Department of Chemistry, University of Richmond, Richmond, Virginia 27173*

## Table of Contents:

|                            |     |
|----------------------------|-----|
| General Methods.....       | S1  |
| Compound preparations..... | S2  |
| Selected NMR spectra.....  | S10 |

**General Methods** All NMR spectra were obtained on either a 300 or 500 MHz Varian INOVA spectrometer. All chemical shifts are reported in ppm versus tetramethylsilane using residual shifts of the deuterated solvent as the internal standard. All <sup>31</sup>P NMR data is reported versus an external standard in acetone (Triphenylphosphate, -16.58 ppm). Infrared spectra were obtained on a MIDAC Prospect Series spectrometer as a glaze on a Horizontal Attenuated Total Reflectance (HATR) cell from Pike Industries. Electrochemical measurements were taken under a nitrogen atmosphere using a BAS Epsilon EC-2000 potentiostat. Cyclic voltammetry data were obtained in a three-electrode cell from +1.7 to -1.7 V, with a glassy carbon working electrode, a platinum wire auxiliary electrode and a platinum wire reference electrode. All data were obtained using a 100 mV/s scan rate with tetrabutylammonium hexafluorophosphate (TBAH) as the electrolyte in *N,N*-dimethylacetamide (DMA) unless otherwise noted. All potentials were reported versus the Normal Hydrogen Electrode (NHE) using cobaltocinium hexafluorophosphate ( $E_{1/2} = -0.78$  V) as an internal standard. For reversible waves the peak-to-peak separation was less than 100 mV. High Resolution Mass Spectrometry data (HRMS) was obtained from the University of Illinois Urbana-Champaign School of Chemical Sciences or the University of Richmond. The difference between calculated and observed peaks is reported in ppm. Thin layer chromatography was performed on a Uniplat silica gel GF from Analtech Inc. Methylene chloride and benzene were run down a column packed with activated alumina and purged with nitrogen prior to use. All other solvents and chemicals were used as received from Sigma-Aldrich, Acros Chemicals or Fischer Scientific. Compounds **5** and **5•HOTf** have been previously reported as diastereomeric mixtures.<sup>11</sup> 3-chloroperbenzoic acid (*m*CPBA) was recrystallized (CAUTION) by using a procedure from Bortolini *et al* (Bortolini, O.; Campestrini, S.; Di Furia, F.; Modena, G. *J. Org. Chem.* **1987**, 52, 5093-5095).

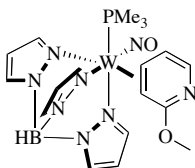

**TpW(NO)(PMe<sub>3</sub>)(3,4- $\eta^2$ -2-methoxypyridine) (5B)**

A solution containing 0.469 g ( $7.776 \times 10^{-4}$  mole) of **5A** and **5B** and 6 mL of MeOH was allowed to stir at ambient temperature for 24 h. After 24 h, the resulting heterogeneous solution was filtered over a 30 mL Fine fritted glass disc. The collected yellow precipitate was stored *in vacuo* as **5B** in an isolated yield of 32% (0.150 g,  $2.452 \times 10^{-4}$  mole). <sup>1</sup>H NMR (CDCl<sub>3</sub>, 300 MHz,  $\delta$ ): 8.09 (1H, d,  $J$ =1.8 Hz, Tp), 7.95 (1H, d,  $J$ =2.3 Hz, Tp), 7.74 (1H, d,  $J$ =2.3 Hz, Tp), 7.72 (1H, d,  $J$ =1.8 Hz, Tp), 7.60 (1H, d,  $J$ =2.3 Hz, Tp), 7.14 (1H, d,  $J$ =2.1 Hz, Tp), 6.38 (1H, d,  $J$ =6.1 Hz, H6), 6.03 (1H, t,  $J$ =2.1, 4.4 Hz, Tp), 6.01 (2H, m, Tp), 5.99 (1H, dd,  $J$ =4.8, 6.1 Hz, H5), 3.85 (3H, s, H7), 3.79 (1H, m, H4) 3.44 (3H, s, MeOH), 2.25 (1H, d,  $J$ =1.7, 9.6 Hz, H3), 1.23 (9H, d,  $J$ =8.7 Hz, PMe<sub>3</sub>). <sup>13</sup>C NMR (CDCl<sub>3</sub>, 75.4 MHz,  $\delta$ ): 173.4 (C2), 144.6 (Tp), 144.1 (Tp), 139.8 (Tp), 136.5 (Tp), 135.9 (Tp), 135.4 (Tp), 127.9 (C6), 115.8 (C5), 106.3 (Tp), 106.0 (Tp), 104.9 (Tp), 62.9 (d,  $J$ =9.2 Hz, C4), 55.9 (C9), 52.4 (C7), 51.6 (MeOH) 50.7 (C3), 13.2 (d,  $J$ =29.8 Hz, PMe<sub>3</sub>). <sup>31</sup>P NMR: -12.80 ppm, (satellite d ( $J$ = 298 Hz), PMe<sub>3</sub>) IR:  $\nu$  (NO) = 1571 cm<sup>-1</sup> (vs). CV: E<sub>p,a</sub> = + 0.06 V.

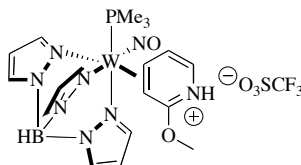

**TpW(NO)(PMe<sub>3</sub>)(3,4- $\eta^2$ -2-methoxypyridinium triflate) (5•HOTf)**

In a vial, 0.124 g ( $3.876 \times 10^{-4}$  mole, 1.1 equiv) of diphenylammonium triflate (DPhAT) was solvated with 0.927 g of DME. The resulting stock solution was added to a vial containing 0.216 g of **5B** ( $3.524 \times 10^{-4}$  mole, 1.0 equiv) and allowed to stir. Within 10 minutes, a fine yellow solid began to precipitate from the reaction solution. The precipitate was collected over a 15 mL Fine fritted glass disc and was washed with 10 mL of DME and then stored *in vacuo*, for an isolated yield of 91%. <sup>1</sup>H NMR (*d*<sub>6</sub>-acetone, 300 MHz,  $\delta$ ): 10.66 (1H, s, NH) 8.15 (1H, d,  $J$ =2.3 Hz, Tp), 8.13 (1H, d,  $J$ =2.2 Hz, Tp), 8.11 (1H, d,  $J$ =2.3 Hz, Tp), 8.00 (1H, d,  $J$ =2.3 Hz, Tp), 7.79 (1H, d,  $J$ =2.1 Hz, Tp), 7.75 (1H, d,  $J$ =2.1 Hz, Tp), 6.54 (1H, dd,  $J$ = 4.8, 12.0 Hz, H5), 6.48 (2H, m, Tp), 6.40 (1H, t,  $J$ =2.3, 4.5 Hz, Tp), 5.98 (1H, dd  $J$ =4.8, 7.2 Hz, H6), 4.10 (1H, ddd,  $J$ = 4.8, 8.8, 13.6 Hz, H4), 3.97 (3H, s, H7), 3.45 (DME), 3.28 (DME) 2.14 (1H, d,  $J$ =8.8 Hz, H3), 1.35 (9H, d,  $J$ =8.9 Hz, PMe<sub>3</sub>). <sup>31</sup>P NMR: -13.20 ppm, (satellite d ( $J$ = 298 Hz), PMe<sub>3</sub>). IR:  $\nu$  (NO) = 1591 cm<sup>-1</sup> (vs). CV: E<sub>p,a</sub> = + 0.74 V.

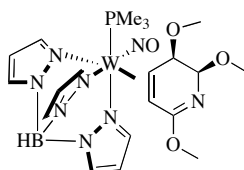

**TpW(NO)(PMe<sub>3</sub>)(3,4- $\eta^2$ -2,5,6-trimethoxy-5,6-dihydropyridine) (7)**

A solution containing 0.086 g of Selectfluor® ( $2.433 \times 10^{-4}$  mole, 1.8 equiv) and 1.61 g of CH<sub>3</sub>CN was stirred for 10 minutes until the solution was homogeneous. In a separate vial, 0.103 g

( $1.351 \times 10^{-4}$  mole, 1 equiv) of **5•HOTf** and 0.160 g of  $\text{Na}_2\text{CO}_3$  was solvated with 4.003 g of MeOH and 0.500 mL of  $\text{CH}_2\text{Cl}_2$ . The Selectfluor<sup>®</sup> solution was added slowly over 15 minutes to a stirring solution of **5•HOTf** and MeOH/  $\text{CH}_2\text{Cl}_2$ . The solution was allowed to react at ambient temperature for 1 h. After 1 h, the reaction solution was washed with saturated sodium bicarbonate (aq) and extracted with  $\text{CH}_2\text{Cl}_2$ . The organic solution was dried over  $\text{MgSO}_4$  and then concentrated to a residue. The concentrated solution was redissolved in THF and induced a precipitate by adding to 70 mL of a stirring  $\text{Et}_2\text{O}$  solution. A fine white precipitate **7** was collected over a 15 mL Fine Fritted glass disc and stored *in vacuo* for an isolated yield was 74% (0.065g,  $9.997 \times 10^{-5}$  mole).  $^1\text{H}$  NMR ( $\text{CD}_3\text{CN}$ , 300 MHz,  $\delta$ ): 8.08 (1H, d,  $J=1.8$  Hz, Tp), 7.91 (1H, d,  $J=2.3$  Hz, Tp), 7.89 (1H, d,  $J=2.3$  Hz, Tp), 7.81 (1H, d,  $J=1.8$  Hz, Tp), 7.74 (1H, d,  $J=2.3$  Hz, Tp), 7.59 (1H, d,  $J=2.1$  Hz, Tp), 6.41 (1H, t,  $J=2.1$ , 4.4 Hz, Tp), 6.32 (1H, t,  $J=2.3$ , 4.4 Hz, Tp), 6.24 (1H, t,  $J=2.3$ , 4.1 Hz, Tp), 4.89 (1H, d,  $J=3.4$  Hz, H6), 4.12 (1H, m, H5), 3.71 (3H, s, H7), 3.56 (3H, s, H8), 3.51 (3H, s, H9), 3.51 (1H, ddd,  $J=1.7$ , 9.7, 11.2 Hz, H4), 1.52 (1H, dd,  $J=1.7$ , 9.6 Hz, H3), 1.22 (9H, d,  $J=8.7$  Hz,  $\text{PMe}_3$ ).  $^{13}\text{C}$  NMR ( $\text{CD}_3\text{CN}$ , 75.4 MHz,  $\delta$ ): 172.0 (C2), 145.7 (Tp), 144.5 (Tp), 141.9 (Tp), 138.5 (Tp), 137.9 (Tp), 136.9 (Tp), 107.8 (Tp), 107.3 (Tp), 106.7 (Tp), 89.7 (C6), 80.6 (C5), 57.4 (C8), 57.3 (d,  $J=13.3$  Hz, C4), 55.9 (C9), 52.8 (C7), 43.8 (C3), 13.7 (d,  $J=29.8$  Hz,  $\text{PMe}_3$ ).  $^{31}\text{P}$  NMR: -10.80 ppm (satellite d ( $J=266$  Hz),  $\text{PMe}_3$ ). IR:  $\nu$  (NO) =  $1570\text{ cm}^{-1}$  (vs),  $\nu$  (imide) =  $1641\text{ cm}^{-1}$  (s). CV:  $E_{p,a} = +0.84$  V. HRMS ( $m/z$ , obs(I); calc(I); error (ppm)): 675.1965, 675.1965, 0.00 ppm.

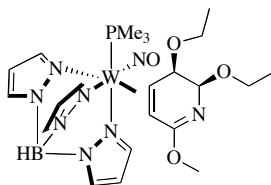

**TpW(NO)(PMe<sub>3</sub>)(3,4- $\eta^2$ -5,6-diethoxy-2-methoxy-5,6-dihydropyridine) (**8**)**

A solution containing 0.060 g of Selectfluor<sup>®</sup> ( $1.694 \times 10^{-4}$  mole, 1.8 equiv) and 1.78 g of  $\text{CH}_3\text{CN}$  was stirred for 10 minutes until the solution was homogeneous. In a separate vial, 0.072 g ( $1.351 \times 10^{-4}$  mole, 1 equiv) of **5•HOTf** and 0.128 g of  $\text{Na}_2\text{CO}_3$  was solvated with 4.003 g of ethanol and 0.500 mL of  $\text{CH}_2\text{Cl}_2$ . The Selectfluor<sup>®</sup> solution was added slowly over 15 minutes to a stirring solution of **5•HOTf** and ethanol/  $\text{CH}_2\text{Cl}_2$ . The solution was allowed to react at ambient temperature for 1 h. After 1 h, the reaction solution was washed with a saturated sodium bicarbonate (aq) solution and extracted with  $\text{CH}_2\text{Cl}_2$ . The organic solution was dried over  $\text{MgSO}_4$  and then concentrated to a residue. The residue was re-dissolved in 0.500 mL of  $\text{CH}_2\text{Cl}_2$  and purified with silica chromatography ( $R_f$ : 0.22 in 30%  $\text{CH}_3\text{CN}$ :  $\text{Et}_2\text{O}$ ) yielding a light-yellow oil with an isolated yield of 68% (0.045g,  $9.186 \times 10^{-4}$  mole).  $^1\text{H}$  NMR ( $d_6$ -acetone, 300 MHz,  $\delta$ ): 8.19 (1H, d,  $J=2.0$  Hz, Tp), 8.09 (1H, d,  $J=2.3$  Hz, Tp), 8.06 (1H, d,  $J=2.4$  Hz, Tp), 7.92 (1H, d,  $J=2.6$  Hz, Tp), 7.90 (1H, d,  $J=2.6$  Hz, Tp), 7.78 (1H, d,  $J=2.0$  Hz, Tp), 6.49 (1H, t,  $J=2.3$ , 4.4 Hz, Tp), 6.45 (1H, t,  $J=2.1$ , 4.4 Hz, Tp), 6.33 (1H, t,  $J=2.3$ , 4.6 Hz, Tp), 5.26 (1H, d,  $J=3.1$  Hz, H6), 4.50 (1H, m, H5), 3.97 (2H, m, H10), 3.88 (3H, s, H7), 3.84 (2H, m, H8), 3.21 (1H, ddd,  $J=2.1$ , 9.5, 11.1 Hz, H4), 1.86 (1H, d,  $J=9.5$  Hz, H3), 1.35 (9H, d,  $J=9.0$  Hz,  $\text{PMe}_3$ ), 1.23 (3H, t,  $J=6.9$ , 14.0 Hz, H9), 1.22 (3H, t,  $J=7.0$ , 13.9 Hz, H11).  $^{13}\text{C}$  NMR ( $d_6$ -acetone, 300 MHz,  $\delta$ ): 179.4 (C2), 144.7 (Tp), 144.4 (Tp), 141.7 (Tp), 138.6 (Tp), 137.9 (Tp), 137.2 (Tp), 107.7 (Tp), 107.3 (Tp), 106.7 (Tp), 86.1 (C6), 78.2 (C5), 66.4 (C10), 65.7 (C8), 60.8 (d,  $J=14.7$  Hz, C4), 56.5 (C7), 40.2 (C3), 15.9 (C11), 15.1 (C9), 12.6 (d,  $J=30.7$  Hz,  $\text{PMe}_3$ ).  $^{31}\text{P}$  NMR: -10.30 ppm (satellite d ( $J=266$  Hz),  $\text{PMe}_3$ ). IR:  $\nu$  (NO) =  $1571\text{ cm}^{-1}$  (vs),  $\nu$  (imide) =  $1644\text{ cm}^{-1}$  (s). CV:  $E_{p,a} = +0.82$  V. HRMS ( $m/z$ , obs(I); calc(I); error (ppm)): 703.2256 (100%), 703.2278 (100%), 3.12 ppm.

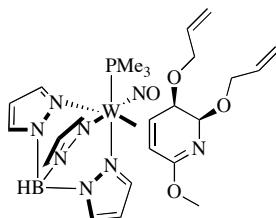

**TpW(NO)(PMe<sub>3</sub>)(3,4- $\eta^2$ -5,6-bis(allyloxy)-2-methoxy-5,6-dihydropyridine) (9)**

A solution containing 0.094 g of Selectfluor<sup>®</sup> ( $2.650 \times 10^{-4}$  mole, 1.8 equiv) and 2.430 g of CH<sub>3</sub>CN was stirred for 10 minutes until the solution was homogeneous. In a separate vial, 0.101 g ( $1.325 \times 10^{-4}$  mole, 1 equiv) of **5•HOTf** and 0.190 g of Na<sub>2</sub>CO<sub>3</sub> was solvated with 1.20 mL of allyl alcohol and 0.500 mL of CH<sub>2</sub>Cl<sub>2</sub>. The Selectfluor<sup>®</sup> solution was added slowly over 15 minutes to a stirring solution of **5•HOTf**. The solution was allowed to react at ambient temperature for 1 h. After 1 h, the reaction solution was washed with a saturated sodium bicarbonate (aq) solution and extracted with CH<sub>2</sub>Cl<sub>2</sub>. The organic solution was dried over MgSO<sub>4</sub> and then concentrated to a residue. The residue was re-dissolved in 0.500 mL of CH<sub>2</sub>Cl<sub>2</sub> and purified with silica chromatography, (R<sub>f</sub>: 0.27 in 30% CH<sub>3</sub>CN: Et<sub>2</sub>O) yielding a light orange solution for an isolated yield of 52% (0.050 g,  $6.890 \times 10^{-5}$  mole) in a ratio of 3:1. <sup>1</sup>H NMR (*d*<sub>6</sub>-acetone, 300 MHz,  $\delta$ ): 8.16 (1H, d, *J*=2.0 Hz, Tp), 8.02 (1H, d, *J*=2.1 Hz, Tp), 8.00 (1H, d, *J*=2.3 Hz, Tp), 7.95 (1H, d, *J*=2.0 Hz, Tp), 7.80 (2H, m, Tp major and minor), 7.71 (1H, d, *J*=2.1 Hz, Tp), 6.46 (1H, t, *J*=2.1, 4.3 Hz, Tp), 6.35 (1H, t, *J*=2.3, 4.5 Hz, Tp), 6.26 (1H, t, *J*=2.2, 4.2 Hz, Tp), 6.06 (4H, m, allyl), 5.37 (2H, ddd, *J*=2.1, 4.0, 6.1 Hz, allyl), 5.31 (2H, ddd, *J*=2.1, 4.0, 6.1 Hz, allyl), 5.17 (1H, d, *J*=3.3 Hz, H6), 4.63 (4H, m, allyl), 4.32 (1H, m, H5), 3.79 (3H, s, H7), 2.67 (1H, ddd, *J*=1.7, 9.9, 11.4 Hz, H4), 1.64 (1H, dd, *J*=1.7, 9.9 Hz, H3), 1.35 (9H, d, *J*=8.7 Hz, PMe<sub>3</sub>). <sup>13</sup>C NMR (*d*<sub>6</sub>-acetone, 75.4 MHz,  $\delta$ ): 173.1 (C2), 146.9 (Tp), 145.4 (Tp), 142.8 (Tp), 139.6 (C9-allyl), 139.2 (Tp), 138.8 (C12-allyl), 138.5 (Tp), 137.5 (Tp), 116.4 (C10-allyl), 115.7 (C13-allyl), 108.6 (Tp), 108.1 (Tp), 107.2 (Tp), 89.6 (C6), 80.9 (C5), 73.2 (C8-allyl), 69.9 (C11-allyl), 59.9 (d, *J*=12.4 Hz, C4), 53.2 (C7), 45.4 (C3), 12.6 (d, *J*=29.2 Hz, PMe<sub>3</sub>). <sup>31</sup>P NMR: -10.20 ppm, (satellite d (*J*=266 Hz), PMe<sub>3</sub>). IR:  $\nu$  (NO) = 1573 cm<sup>-1</sup> (vs),  $\nu$  (imide) = 1642 cm<sup>-1</sup> (s). CV: E<sub>p,a</sub> = +0.94 V. HRMS (*m/z*, obs(I); calc(I); error (ppm)): 727.2286 (100%), 727.2278 (100%), 1.10 ppm.

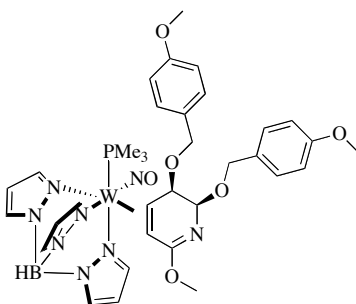

**TpW(NO)(PMe<sub>3</sub>)(3,4- $\eta^2$ -2-methoxy-5,6-bis(4-methoxybenzyloxy)-5,6-dihydropyridine) (10)**

A solution containing 0.071 g of Selectfluor<sup>®</sup> ( $2.007 \times 10^{-4}$  mole, 1.8 equiv) and 1.960 g of CH<sub>3</sub>CN was stirred for 10 minutes until homogeneous. In a separate vial, 0.085 g ( $1.115 \times 10^{-4}$  mole, 1 equiv) of **5•HOTf** and 0.118 g of Na<sub>2</sub>CO<sub>3</sub> was solvated with 1.20 mL of 4-methoxybenzyl alcohol and 0.500 mL of CH<sub>2</sub>Cl<sub>2</sub>. The Selectfluor<sup>®</sup> solution was added slowly over 15 minutes to a stirring

solution of **5•HOTf** and 4-methoxybenzyl alcohol/  $\text{CH}_2\text{Cl}_2$ . The solution was allowed to react at ambient temperature for 1 h. After 1 h, the reaction solution was washed with a saturated sodium bicarbonate (aq) solution and extracted with  $\text{CH}_2\text{Cl}_2$ . The organic solution was dried over  $\text{MgSO}_4$  and then concentrated to a residue. The residue was re-dissolved in 0.500 mL of  $\text{CH}_2\text{Cl}_2$  and purified with silica chromatography. ( $R_f$ : 0.32 in 30%  $\text{CH}_3\text{CN}$ :  $\text{Et}_2\text{O}$ ). The resulting solution was concentrated to a residue and re-solvated in 0.500 mL of THF and added to 75 mL of a stirring hexanes solution. An off-white precipitate was generated and collected over a 15 mL Fine fritted glass disc and stored *in vacuo* for an isolated yield of 59% (0.058g,  $6.578 \times 10^{-5}$  mole).  $^1\text{H}$  NMR ( $d_6$ -acetone, 300 MHz,  $\delta$ ): 8.14 (1H, d,  $J=2.0$  Hz, Tp), 8.00 (1H, d,  $J=2.3$  Hz, Tp), 7.99 (2H, d,  $J=2.1$  Hz, Tp), 7.79 (1H, d,  $J=2.3$  Hz, Tp), 7.60 (1H, d,  $J=2.0$  Hz, Tp), 7.43 (4H, dd,  $J=8.5$ , 17.0 Hz, Ar), 6.93 (4H, dd,  $J=4.2$ , 8.6 Hz, Ar), 6.44 (1H, t,  $J=2.3$ , 4.4 Hz, Tp), 6.34 (1H, t,  $J=2.4$ , 4.5 Hz, Tp), 6.26 (1H, t,  $J=2.1$ , 4.4 Hz, Tp), 5.27 (1H, d,  $J=3.4$  Hz, H6), 5.18 (1H, d,  $J=11.9$  Hz, benzylic), 4.94 (2H, q,  $J=11.9$ , 20.2 Hz, benzylic), 4.64 (1H, d,  $J=11.9$  Hz, benzylic), 4.37 (1H, m, H5), 3.81 (3H, s, H7), 3.80 (3H, s, Ar-OMe), 3.79 (3H, s, Ar-OMe), 2.72 (1H, ddd,  $J=1.8$ , 9.9, 11.1 Hz, H4), 1.62 (1H, dd,  $J=1.8$ , 9.9 Hz, H3), 1.13 (9H, d,  $J=8.4$  Hz,  $\text{PMe}_3$ ).  $^{13}\text{C}$  NMR ( $d_6$ -acetone, 75.4 MHz,  $\delta$ ): 172.7 (C2), 159.9 (q-Ar), 159.7 (q-Ar), 146.0 (Tp), 144.6 (Tp), 141.8 (Tp), 138.2 (Tp), 137.5 (Tp), 136.5 (Tp), 133.7 (q-Ar), 130.5 (q-Ar and 2-Ar), 129.7 (2 Ar), 114.4 (4 Ar), 114.3 (2 Ar), 107.7 (Tp), 107.1 (Tp), 106.3 (Tp), 89.1 (C6), 79.2 (C5), 72.5 (benzylic), 71.1 (benzylic), 59.2 (d,  $J=12.9$  Hz, C4), 55.6 (Ar-OMe), 55.2 (Ar-OMe), 52.3 (C7), 44.5 (C3), 13.2 (d,  $J=29.3$  Hz,  $\text{PMe}_3$ ).  $^{31}\text{P}$  NMR: -11.60 ppm, (satellite d ( $J=268$  Hz),  $\text{PMe}_3$ ). IR:  $\nu$  (NO) =  $1569\text{ cm}^{-1}$  (vs),  $\nu$  (imide) =  $1644\text{ cm}^{-1}$  (s). CV:  $E_{p,a} = +0.97\text{ V}$ . HRMS ( $m/z$ , obs(I); calc(I); error (ppm)): 887.2791 (100%), 887.2813 (100%), 2.47 ppm.

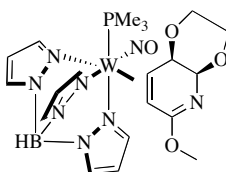

**TpW(NO)(PMe<sub>3</sub>)(7,8- $\eta^2$ -6-methoxy-2,3,4a,8a-tetrahydro-[1,4]dioxino[5,6-*b*]pyridine) (11)**

A solution of 0.060 g of Selectfluor® ( $1.694 \times 10^{-4}$  mole, 1.8 equiv) and 1.842 g of  $\text{CH}_3\text{CN}$  was stirred for 10 min until the solution was homogeneous. In a separate vial, 0.071 g ( $9.317 \times 10^{-5}$  mole, 1 equiv) of **5•HOTf** and 0.116 g of  $\text{Na}_2\text{CO}_3$  was solvated with 2.213 g of ethylene glycol and 0.500 mL of  $\text{CH}_2\text{Cl}_2$ . The Selectfluor® solution was added slowly over 15 minutes to a stirring solution of **5•HOTf** and ethylene glycol/  $\text{CH}_2\text{Cl}_2$ . The solution was allowed to react at ambient temperature for 1 h. After 1 h, the reaction solution was washed with a saturated sodium bicarbonate (aq) solution and extracted with  $\text{CH}_2\text{Cl}_2$ . The organic solution was dried over  $\text{MgSO}_4$  and then concentrated to a residue. The residue was re-dissolved in 0.500 mL of  $\text{CH}_2\text{Cl}_2$  and purified with silica chromatography. ( $R_f$ : 0.27 in 30%  $\text{CH}_3\text{CN}$ :  $\text{Et}_2\text{O}$ ) with isolation of a light-yellow oil for an isolated yield of 66% (0.041g,  $6.149 \times 10^{-5}$  mole).  $^1\text{H}$  NMR ( $d_6$ -acetone, 300 MHz,  $\delta$ ): 8.16 (1H, d,  $J=2.0$  Hz, Tp), 8.03 (1H, d,  $J=2.3$  Hz, Tp), 8.02 (1H, d,  $J=2.3$  Hz, Tp), 7.91 (1H, d,  $J=2.1$  Hz, Tp), 7.83 (1H, d,  $J=2.3$  Hz, Tp), 7.72 (1H, d,  $J=2.1$  Hz, Tp), 6.46 (1H, t,  $J=2.1$ , 4.4 Hz, Tp), 6.38 (1H, t,  $J=2.3$ , 4.6 Hz, Tp), 6.27 (1H, t,  $J=2.1$ , 4.4 Hz, Tp), 5.25 (1H, d,  $J=3.1$  Hz, H4a), 4.32 (1H, m, H8a), 4.07 (1H, ddd,  $J=2.6$ , 11.1, 11.3 Hz), 3.81 (1H, m), 3.80 (3H, s), 3.72 (1H, dd,  $J=2.6$ , 11.2 Hz), 3.39 (1H, dd,  $J=1.8$ , 11.3 Hz), 2.67 (1H, ddd,  $J=1.6$ , 9.7, 11.3 Hz, H8), 1.59 (1H, dd,  $J=1.6$ , 9.7 Hz, H7), 1.35 (9H, d,  $J=8.7$  Hz,  $\text{PMe}_3$ ).  $^{13}\text{C}$  NMR ( $d_6$ -acetone, 75.4 MHz,  $\delta$ ): 173.1 (C6), 145.1 (Tp), 143.8 (Tp), 141.1 (Tp), 137.7 (Tp), 137.1 (Tp), 136.1 (Tp), 107.1 (Tp), 106.7 (Tp), 105.8 (Tp), 80.9 (C4a), 76.3

(C8a), 66.7, 59.1, 58.7 (d,  $J=13.7$  Hz, C8), 52.4, 42.9 (C7), 12.3 (d,  $J=29.2$  Hz,  $\text{PMe}_3$ ).  $^{31}\text{P}$  NMR: -10.20 ppm, (satellite d ( $J=266$  Hz),  $\text{PMe}_3$ ). IR:  $\nu(\text{NO}) = 1565\text{ cm}^{-1}$  (vs),  $\nu(\text{imide}) = 1641\text{ cm}^{-1}$  (s). CV:  $E_{\text{p,a}} = +0.97$  V. HRMS ( $m/z$ , obs(I); calc(I); error (ppm)): 673.1815 (100%), 673.1809 (100%), 0.89 ppm.

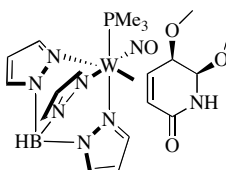

**$\text{TpW}(\text{NO})(\text{PMe}_3)(3,4\text{-}\eta^2\text{-5,6-dimethoxy-5,6-dihydropyridin-2(1H)-one)$  (12)**

A solution was prepared containing 0.065 g ( $9.674 \times 10^{-5}$  mole, 1.0 equiv) of **7** and 5 mL of  $\text{CH}_3\text{CN}$ . 1 mL of 1M HCl was added to the  $\text{CH}_3\text{CN}$  solution and allowed to react at ambient temperature for 16 h. The resulting reaction was quenched with 10 mL of a saturated sodium bicarbonate (aq) solution and extracted with  $\text{CH}_2\text{Cl}_2$ . The organic solution was dried with  $\text{MgSO}_4$  and filtered over a 15 mL M fritted glass disc and concentrated to a residue. The residue was re-dissolved in 0.500 mL of  $\text{CH}_2\text{Cl}_2$  and purified with silica chromatography, ( $R_f$ : 0.22 in 30%  $\text{CH}_3\text{CN}$ :  $\text{Et}_2\text{O}$ ) with an isolation of a red-brown oil in 67% yield (0.042g,  $6.481 \times 10^{-5}$  mole).  $^1\text{H}$  NMR ( $\text{CD}_3\text{CN}$ , 300 MHz,  $\delta$ ): 8.06 (1H, d,  $J=1.8$  Hz, Tp), 7.91 (1H, d,  $J=2.3$  Hz, Tp), 7.88 (1H, d,  $J=2.3$  Hz, Tp), 7.83 (1H, d,  $J=1.8$  Hz, Tp), 7.72 (1H, d,  $J=2.4$  Hz, Tp), 7.55 (1H, d,  $J=2.1$  Hz, Tp), 6.40 (1H, t,  $J=2.1$ , 4.4 Hz, Tp), 6.28 (1H, t,  $J=2.3$ , 4.6 Hz, Tp), 6.23 (1H, t,  $J=2.3$ , 4.6 Hz, Tp), 4.81 (1H, d,  $J=3.4$  Hz, H6), 4.45 (1H, m, H5), 3.72 (3H, s, H7), 3.54 (3H, s, H8), 2.70 (1H, ddd,  $J=1.7$ , 9.8, 11.4 Hz, H4), 1.44 (1H, dd,  $J=1.7$ , 9.8 Hz, H3), 1.18 (9H, d,  $J=8.9$  Hz,  $\text{PMe}_3$ ).  $^{13}\text{C}$  NMR ( $\text{CD}_3\text{CN}$ , 75.4 MHz,  $\delta$ ): 171.2 (C2), 145.8 (Tp), 144.3 (Tp), 141.8 (Tp), 138.3 (Tp), 137.7 (Tp), 136.8 (Tp), 107.8 (Tp), 107.2 (Tp), 106.5 (Tp), 89.1 (C6), 71.2 (C5), 60.1 (d,  $J=13.7$  Hz, C4), 55.3 (C8), 52.8 (C7), 43.5 (C3), 12.9 (d,  $J=29.8$  Hz,  $\text{PMe}_3$ ). IR:  $\nu(\text{NO}) = 1556\text{ cm}^{-1}$  (vs),  $\nu(\text{amide}) = 1631\text{ cm}^{-1}$  (s). CV:  $E_{\text{p,a}} = +0.97$  V. HRMS ( $m/z$ , obs(I); calc(I); error (ppm)): 661.1805 (100%), 661.1808 (100%), 0.45 ppm.

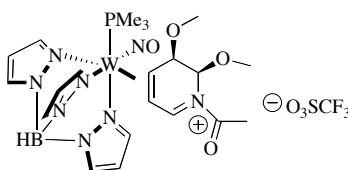

**$\text{TpW}(\text{NO})(\text{PMe}_3)(3,4\text{-}\eta^2\text{-1-acetyl-5,6-dimethoxy-5,6-dihydropyridinium triflate})$  (14)**

A solution containing 0.192 g ( $5.684 \times 10^{-4}$  mole, 1.05 equiv) of Selectfluor<sup>®</sup> and 1.420 g of  $\text{CH}_3\text{CN}$  and 1.242 g of MeOH was allowed to stir at ambient temperature for 1 h. After 1h, the solution was added to a vial containing 0.400 g ( $5.167 \times 10^{-4}$  mole, 1.00 equiv) of **13** and allowed to react for 2 h. After 2 h, the reaction solution was concentrated to a brown residue. The residue was re-dissolved with 20 mL of  $\text{CH}_2\text{Cl}_2$  and filtered through a celite plug. The resulting filtrate was concentrated to a residue and then re-dissolved in 1 mL of  $\text{CH}_2\text{Cl}_2$  and added to a 75 mL solution of  $\text{Et}_2\text{O}$ . The resulting light tan precipitate was isolated over a 30 mL Fine fritted glass disc. The precipitate was then dissolved in 2.28 g of THF and allowed to stir at ambient temperature for 16 h. After 16 h, the THF was filtered over a 15 mL fritted glass disc and washed with 5 mL of THF and then washed with 50 mL of hexanes. The light-yellow precipitate (**14**) was stored *in vacuo* overnight with an

isolated yield of 55% (0.235 g  $2.811 \times 10^{-4}$  mole).  $^1\text{H}$  NMR ( $d_6$ -acetone, 300 MHz,  $\delta$ ): 8.88 (1H, d,  $J=2.2$  Hz, Tp), 8.39 (1H, d,  $J=2.3$  Hz, Tp), 8.36 (1H, d,  $J=3.6$  Hz, H2), 8.23 (1H, d,  $J=2.3$  Hz, Tp), 8.17 (1H, d,  $J=2.4$  Hz, Tp), 7.99 (1H, d,  $J=2.3$  Hz, Tp), 7.59 (1H, d,  $J=2.1$  Hz, Tp), 6.67 (1H, t,  $J=2.3$ , 4.7 Hz, Tp), 6.61 (1H, t,  $J=2.3$ , 4.7 Hz, Tp), 6.47 (1H, t,  $J=2.3$ , 4.7 Hz, Tp), 5.70 (1H, d,  $J=4.3$  Hz, H6), 4.75 (1H, dd,  $J=5.0$ , 7.0 Hz, H4), 4.59 (1H, dd,  $J=1.0$ , 4.3 Hz, H5), 3.79 (1H, dd,  $J=7.6$ , 14.5 Hz, H3), 3.56 (3H, s, H9), 3.54 (3H, s, H10), 2.68 (3H, s, H8), 1.33 (9H, d,  $J=9.9$  Hz,  $\text{PMe}_3$ ).  $^{13}\text{C}$  NMR (75.4 MHz,  $\text{CD}_3\text{CN}$ ,  $\delta$ ): 171.8 (C7), 150.0 (Tp), 146.9 (Tp), 145.2 (C2), 143.0 (Tp), 139.6 (Tp), 139.4 (Tp), 109.5 (Tp), 108.8 (Tp), 108.4 (Tp), 82.4 (C3), 82.0 (C6), 80.1 (C5), 62.2 (d,  $J=13.8$ , C4), 56.9 (C9), 56.1 (C10), 22.5 (C8), 13.0 (d,  $J=32.7$ ,  $\text{PMe}_3$ ).  $^{31}\text{P}$  NMR: -6.10 ppm, (satellite d ( $J=266$  Hz),  $\text{PMe}_3$ ). IR:  $\nu$  (NO) =  $1629\text{ cm}^{-1}$  (s)  $\nu$  (amide) =  $1697\text{ cm}^{-1}$  (m). HRMS(obs'd (%), calc'd (%), ppm): 687.1965 (100), 687.1978 (100), 1.9 ppm.

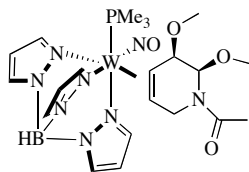

**TpW(NO)(PMe<sub>3</sub>)(3,4- $\eta^2$ -5,6-dimethoxy-5,6-dihydropyridin-1(2H)-yl)ethanone) (15)**

In a test tube, 0.004 g of sodium borohydride ( $7.894 \times 10^{-5}$  mole, 0.5 equiv) was solvated with 0.500 mL of THF and added to a cold bath at  $-20^\circ\text{C}$ . In a separate test tube, 0.132 g ( $1.588 \times 10^{-4}$  mole, 1.0 equiv) of **14** was solvated with 1 mL of MeOH and added to the cold bath at  $-20^\circ\text{C}$ . After both test tubes were allowed to cool for 10 minutes, **14** was added to the  $\text{NaBH}_4$  test tube and allowed to react at  $-20^\circ\text{C}$  for 3 h. The reaction solution was concentrated to a residue and re-solvated in  $\text{CH}_2\text{Cl}_2$  and filtered through a celite plug. The  $\text{CH}_2\text{Cl}_2$  solution was concentrated to a residue and re-solvated in 0.5 mL of THF and added to a 75 mL stirring solution of hexanes, yielding a tan-white precipitate. The precipitate (**15**) was isolated over a 15 mL Fine Fritted glass disc and dried *in vacuo* for an isolated yield of 71% (0.077g,  $5.605 \times 10^{-5}$ ).  $^1\text{H}$  NMR ( $d_6$ -acetone, 300 MHz,  $\delta$ ): (**Major rotational isomer**): 8.36 (1H, d,  $J=1.8$  Hz, Tp), 8.07 (1H, d,  $J=1.8$  Hz, Tp), 7.95 (1H, d,  $J=2.3$  Hz, Tp), 7.91 (1H, d,  $J=2.1$  Hz, Tp), 7.79 (1H, d,  $J=2.4$  Hz, Tp), 7.41 (1H, d,  $J=2.1$  Hz, Tp), 6.40 (1H, t,  $J=2.1$ , 4.3 Hz, Tp), 6.35 (2H, m, Tp), 5.16 (1H, d,  $J=3.2$  Hz, H6), 4.70 (2H, dd,  $J=12.5$ , 20.0 Hz, H2A and H2B), 4.30 (1H, m, H5), 3.54 (3H, s, H9), 3.50 (3H, s, H10) 2.80 (1H, ddd,  $J=5.3$ , 11.6, 16.9 Hz, H4), 2.11 (3H, s, H8), 1.30 (9H, d,  $J=8.9$  Hz,  $\text{PMe}_3$ ) 1.20 (1H, buried, H3). (**Minor Rotational Isomer**): 8.13 (1H, d,  $J=2.0$  Hz, Tp), 8.11 (1H, d,  $J=1.8$  Hz, Tp), 7.97 (1H, d,  $J=2.3$  Hz, Tp), 7.92 (1H, d,  $J=2.3$  Hz, Tp), 7.81 (1H, d,  $J=2.4$  Hz, Tp), 7.39 (1H, d,  $J=1.8$  Hz, Tp), 6.43 (1H, t,  $J=2.3$ , 4.4 Hz, Tp), 6.35 (2H, m, Tp), 5.79 (1H, d,  $J=2.4$  Hz, H6), 4.50 (2H, dd,  $J=13.9$ , 24.9 Hz, H2A and H2B), 4.00 (1H, m, H5), 3.48 (3H, s, H9), 3.46 (3H, s, H10) 2.80 (1H, ddd,  $J=5.3$ , 11.6, 16.9 Hz, H4), 2.14 (3H, s, H8), 1.50 (1H, buried, H3), 1.29 (9H, d,  $J=9.0$  Hz,  $\text{PMe}_3$ ).  $^{13}\text{C}$  NMR ( $d_6$ -acetone, 75.4 MHz,  $\delta$ ): 173.1 (C7), 145.6 (Tp), 143.9 (Tp), 142.7 (Tp), 138.8 (Tp), 138.6 (Tp), 138.5 (Tp), 125.3 (C7), 108.3 (Tp), 108.2 (Tp), 108.1 (Tp), 85.4 (C6), 81.3 (C5), 56.8 (C9), 56.3 (C10), 50.2 (C3), 48.7 (d,  $J=11.9$  Hz, C4), 41.3 (C2), 24.1 (C8) 14.90 (d,  $J=28.9$  Hz,  $\text{PMe}_3$ ).  $^{31}\text{P}$  NMR: -11.60 ppm, (satellite d ( $J=268$  Hz),  $\text{PMe}_3$ ). IR:  $\nu$  (NO) =  $1565\text{ cm}^{-1}$  (vs). CV:  $E_{p,a} = +0.90$  V.

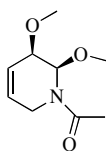

**1-(5,6-dimethoxy-5,6-dihydropyridin-1(2H)-yl)ethanone (16)**

In a vial, 0.087 g ( $2.653 \times 10^{-4}$  mole, 2.0 equiv) of ceric ammonium nitrate was added to a vial containing 0.091 g ( $1.339 \times 10^{-4}$  mole, 1.0 equiv) of **15**. The two reagents were solvated with 0.840 g of  $\text{CDCl}_3$ . The resulting orange-brown heterogeneous mixture was allowed to stir at ambient temperature for 3 h. After 3h, the reaction solution was washed with a saturated sodium bicarbonate (aq) solution and extracted with  $\text{CH}_2\text{Cl}_2$ . The organic solution was dried over  $\text{MgSO}_4$  and then concentrated to a residue. The residue was re-dissolved in 0.500 mL of  $\text{CH}_2\text{Cl}_2$  and purified with silica chromatography. ( $R_f$ : 0.40 in 30% EtOAc: Et<sub>2</sub>O). Compound **16** was isolated as a light yellow oil in a 40% yield (0.010g,  $5.356 \times 10^{-5}$  mole).  $^1\text{H}$  NMR ( $d_6$ -acetone, 500 MHz,  $\delta$ ): 6.03 (1H, dd,  $J=1.4, 4.0$  Hz, H6) 5.70 (2H, m, H4 and H3), 4.45 (1H,  $J=2.6, 3.8, 5.4, 6.2, 8.9$  Hz, H2A), 3.70 (1H,  $J=2.4, 2.8, 4.0, 6.2$  Hz, H5), 3.42 (3H, s, H9), 3.40 (3H, s, H10) 3.21 (1H, buried, H2B) 2.10 (3H, s, H8).  $^{13}\text{C}$  NMR ( $d_6$ -acetone, 125 MHz,  $\delta$ ): 170.3 (C7), 125.1 (C4), 123.8 (C3), 82.2 (C6), 75.0 (C5), 55.5 (C9), 54.9 (C10), 38.1 (C2), 20.9 (C8). HRMS ( $\text{C}_9\text{H}_{15}\text{N}_1\text{O}_3+\text{Na}$ ) ( $m/z$ , obs(I); calc(I); error (ppm)) 208.0950 (100%); 208.0958 (100%), 3.84 ppm.

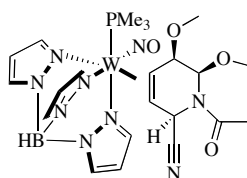

**TpW(NO)(PMe<sub>3</sub>)(3,4- $\eta^2$ -1-acetyl-5,6-dimethoxy-1,2,5,6-tetrahydropyridine-2-carbonitrile) (17)**

In a vial, 0.061 g of **14** ( $7.535 \times 10^{-5}$  mole, 1 equiv) and 0.009 g sodium cyanide ( $1.507 \times 10^{-4}$  mole, 2 equiv) was combined with 0.780 g of  $\text{CH}_3\text{CN}$ . The reaction was allowed to stir at ambient temperature for 1.5 h. The reaction solution was then concentrated to a residue. The residue was re-dissolved in 10 mL of  $\text{CH}_2\text{Cl}_2$  and filtered through a celite plug. The resulting  $\text{CH}_2\text{Cl}_2$  solution was concentrated to a residue and then re-dissolved in 0.284 g of THF and added to a 70 mL of a stirring hexanes solution, yielding a fine off-white precipitate. The precipitate (**17**) was isolated by filtering the hexanes solution over a 15 mL Fine fritted glass disc and stored *in vacuo* with an isolated yield of 72% (0.041g,  $5.369 \times 10^{-5}$  mole).  $^1\text{H}$  NMR ( $d_6$ -acetone, 300 MHz,  $\delta$ ): 8.20 (1H, d,  $J=2.0$  Hz, Tp), 8.04 (1H, d,  $J=1.8$  Hz, Tp), 7.96 (2H, m Tp), 7.88 (1H, d,  $J=2.4$  Hz, Tp), 7.52 (1H, d,  $J=2.0$  Hz, Tp), 6.57 (1H, s, H2), 6.38 (1H, t,  $J=2.3, 4.4$  Hz, Tp), 6.35 (2H, m, Tp), 5.23 (1H, d,  $J=4.1$  Hz, H6), 4.52 (1H, t,  $J=3.0, 5.9$  Hz, H5), 3.54 (3H, s, H9), 3.52 (3H, s, H10) 2.75 (1H, ddd,  $J=3.1, 12.8, 15.1$  Hz, H4), 2.17 (3H, s, H8), 1.29 (9H, d,  $J=8.7$  Hz,  $\text{PMe}_3$ ) 0.98 (1H, d,  $J=12.8$  Hz, H3).  $^{13}\text{C}$  NMR ( $d_6$ -acetone, 300 MHz,  $\delta$ ): 173.1 (C7), 145.6 (Tp), 143.9 (Tp), 142.7 (Tp), 138.8 (Tp), 138.6 (Tp), 138.5 (Tp), 125.3 (C11-CN), 108.3 (Tp), 108.2 (Tp), 108.1 (Tp), 85.4 (C6), 81.3 (C5), 56.8 (C9), 56.3 (C10), 50.2 (C3), 48.7 (d,  $J=11.9$  Hz, C4), 41.3 (C2), 24.1 (C8) 14.90 (d,  $J=28.9$  Hz,  $\text{PMe}_3$ ).  $^{31}\text{P}$  NMR: -11.60 ppm, (satellite d ( $J=268$  Hz),  $\text{PMe}_3$ ). IR:  $\nu$  (NO) =  $1565\text{ cm}^{-1}$  (vs). CV:  $E_{p,a} = +1.00$  V. HRMS ( $m/z$ , obs(I); calc(I); error (ppm)): 714.2065 (100%), 714.2081 (100%), 2.21 ppm.



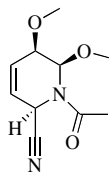

**1-acetyl-5,6-dimethoxy-1,2,5,6-tetrahydropyridine-2-carbonitrile) (18)**

In a vial, 0.069 g ( $2.105 \times 10^{-4}$  mole, 2.0 equiv) of ceric ammonium nitrate was added to 0.076 g ( $1.052 \times 10^{-4}$  mole, 1 equiv) of **17**. The two reagents were solvated with 0.773 g of  $\text{CDCl}_3$ . The resulting orange-brown heterogeneous mixture was allowed to stir at ambient temperature for 3 h. After 3h, the reaction solution was washed with a saturated sodium bicarbonate (aq) solution and extracted with  $\text{CH}_2\text{Cl}_2$ . The organic solution was dried over  $\text{MgSO}_4$  and then concentrated to a residue. The residue was re-dissolved in 0.500 mL of  $\text{CH}_2\text{Cl}_2$  and purified with silica chromatography. ( $R_f$ : 0.35 in 30% EtOAc:  $\text{Et}_2\text{O}$ ). Compound **18** was isolated as a light yellow oil in a 62% yield (0.014g,  $6.524 \times 10^{-5}$  mole).  $^1\text{H}$  NMR ( $d_6$ -acetone, 500 MHz,  $\delta$ ): **Major Rotational Isomer**: 5.90 (2H (major and minor rotational isomer), dddd,  $J = 10.2, 2.4, 1.2, 3.6$  Hz, H3), 5.82 (1H, dddd,  $J = 10.2, 3.5, 2.4$  Hz, H4), 5.58 (1H, ddd,  $J = 2.4, 2.8, 3.4$  Hz, H2), 5.52 (1H, dd,  $J = 1.2, 4.2$  Hz, H6), 4.15 (1H, dddd,  $J = 2.4, 2.8, 3.6, 4.2$  Hz, H5), 3.45 (3H, s, H9), 3.42 (3H, s, H10) 2.31 (3H, s, H8).  $^{13}\text{C}$  NMR ( $d_6$ -acetone, 500 MHz,  $\delta$ ): **Major rotational isomer**: 171.6 (C7), 129.9 (C3), 120.9 (C4), 118.5 (C11-CN), 84.1 (C6), 76.1 (C5), 57.4 (C9), 56.7 (C10), 40.3 (C2), 22.7 (C8). **Minor rotational isomer**: 172.0 (C7), 130.8 (C3), 120.4 (C4), 118.6 (C11-CN), 78.0 (C6), 75.7 (C5), 57.4 (C9), 57.3 (C10), 44.3 (C2), 22.8 (C8). HRMS ( $\text{C}_{10}\text{H}_{14}\text{N}_2\text{O}_3 + \text{Na}$ ) ( $m/z$ , obs(I); calc(I); error (ppm)) 233.0900 (100%); 233.0902 (100%), 0.85 ppm.

## Selected Spectra:

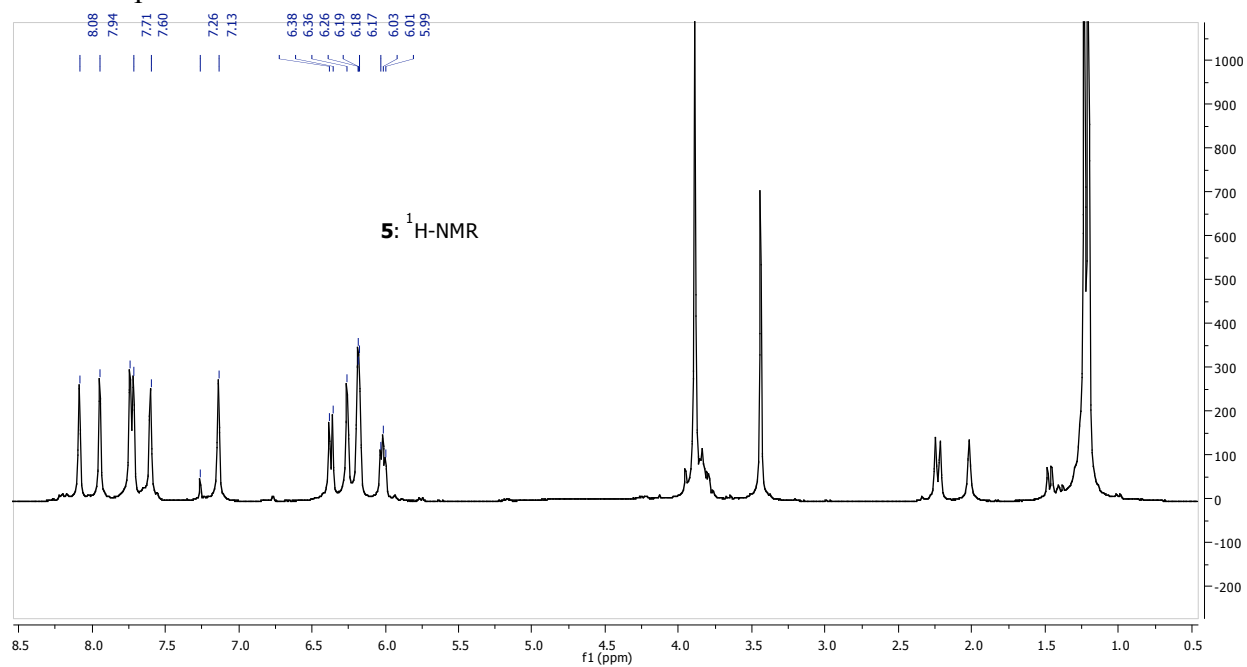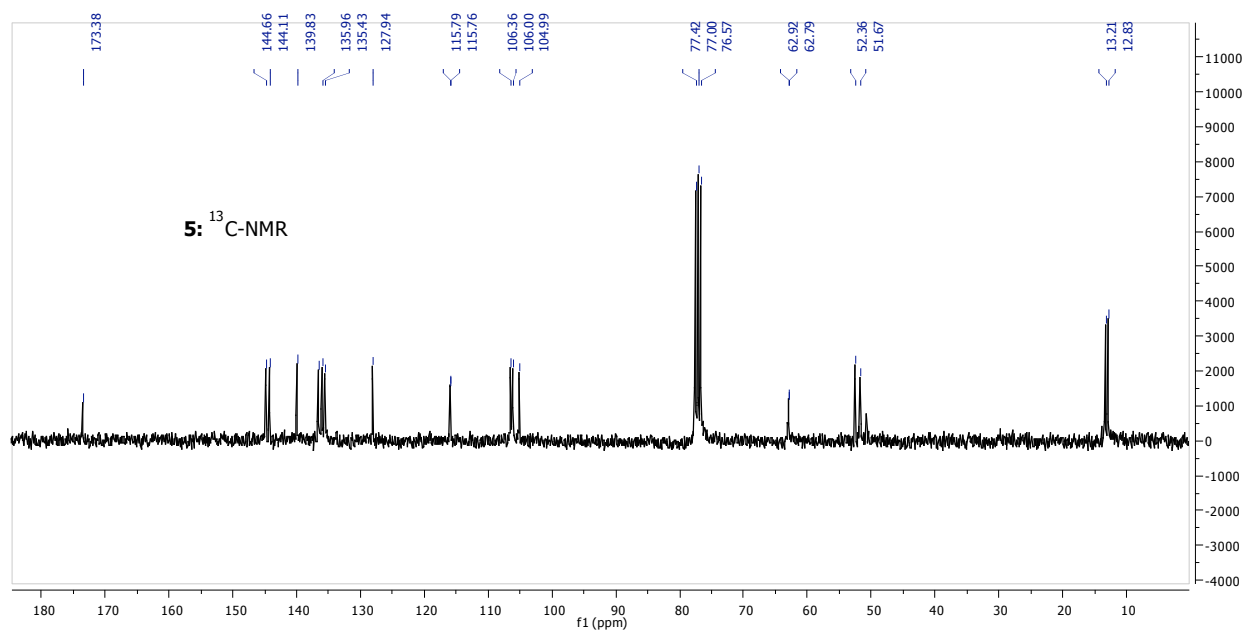

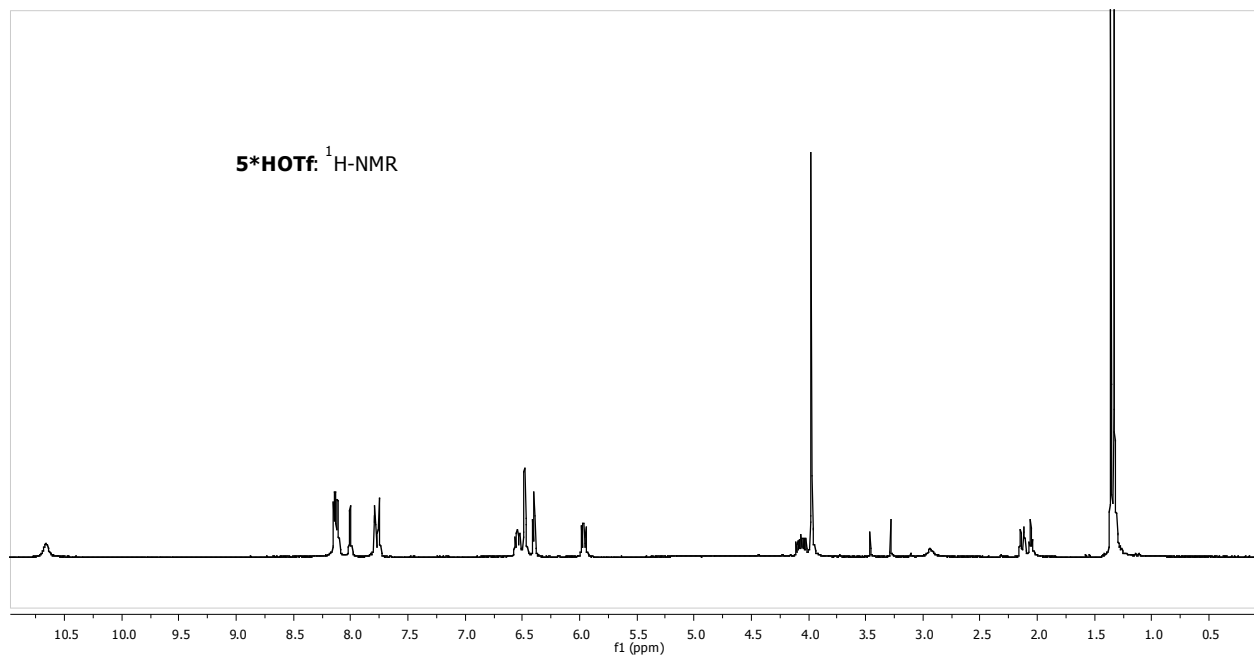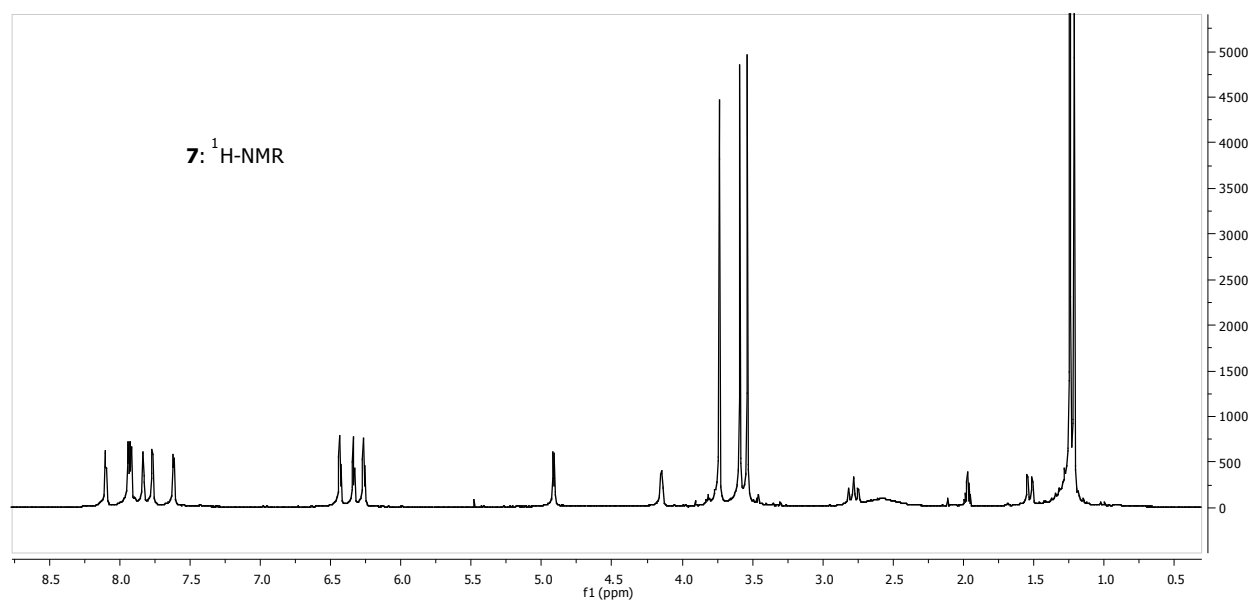

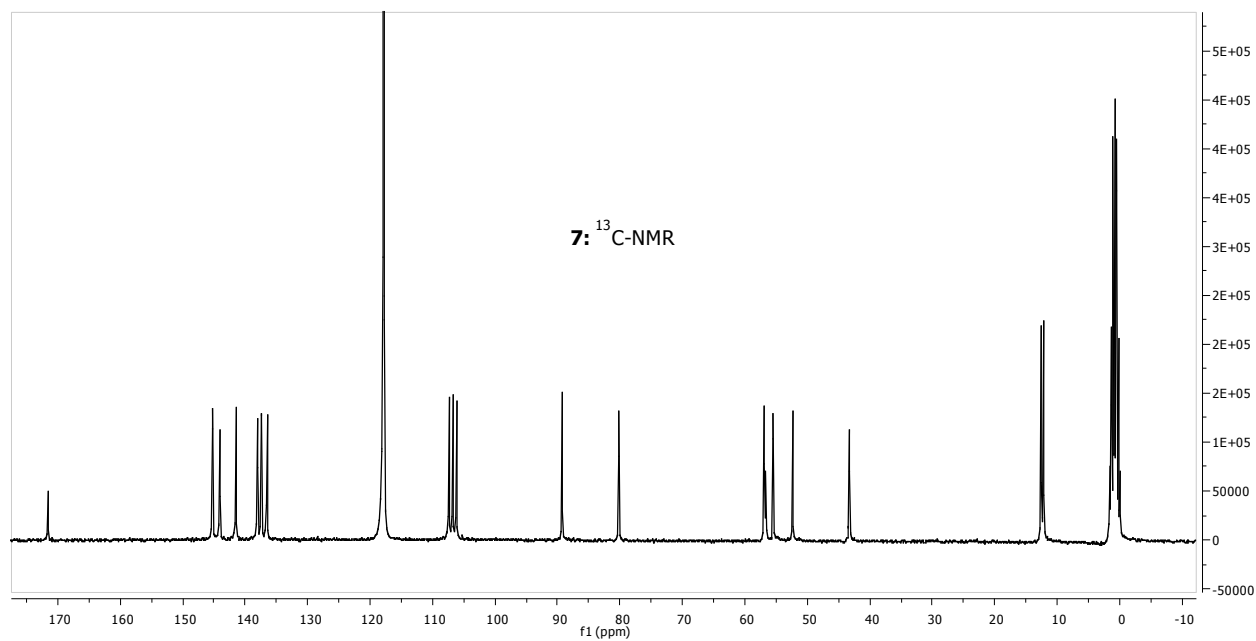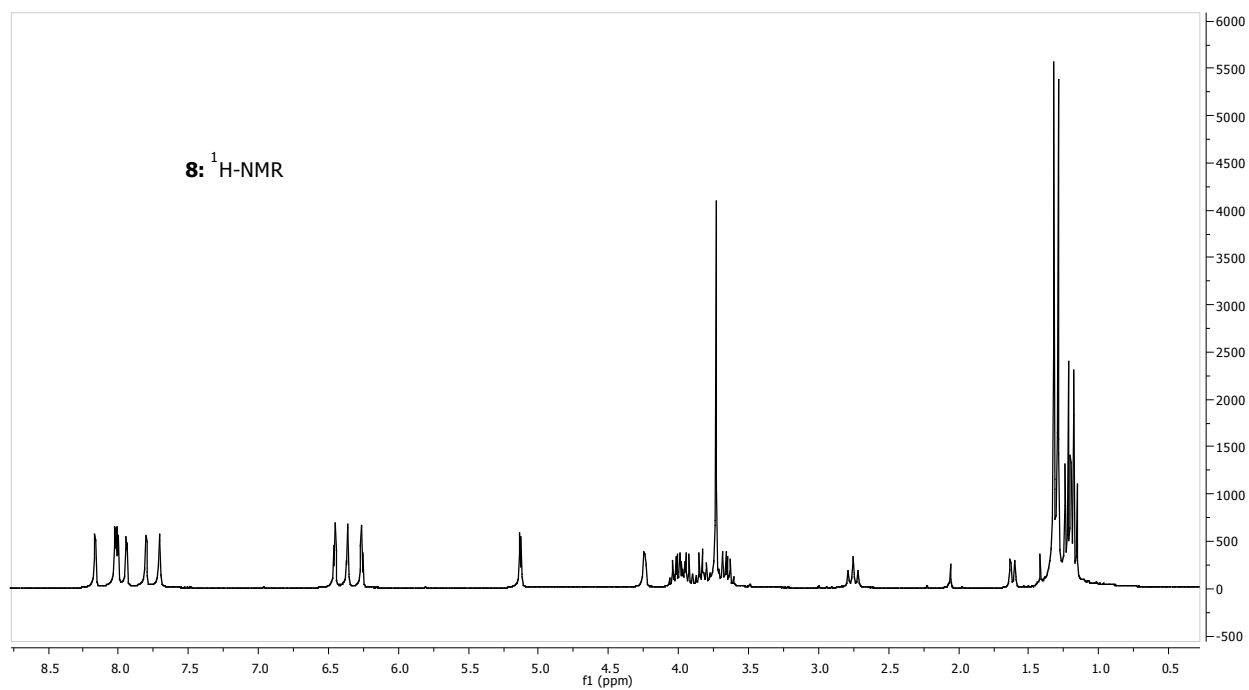

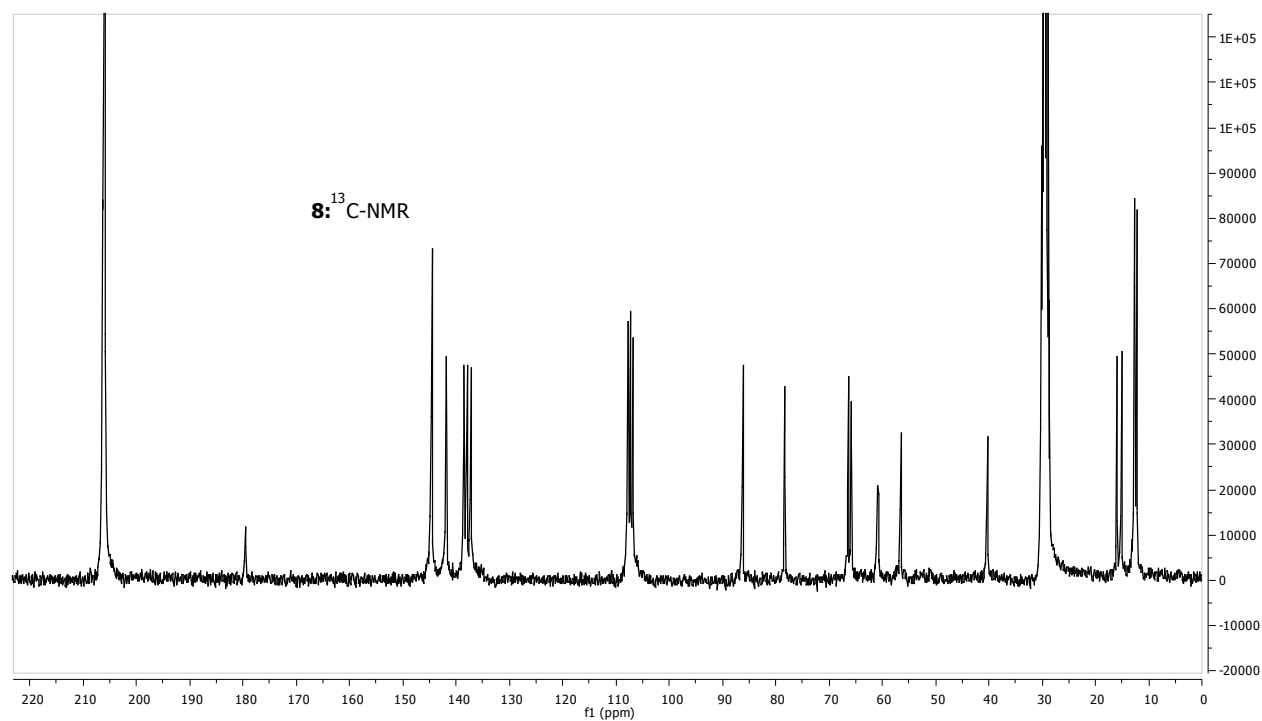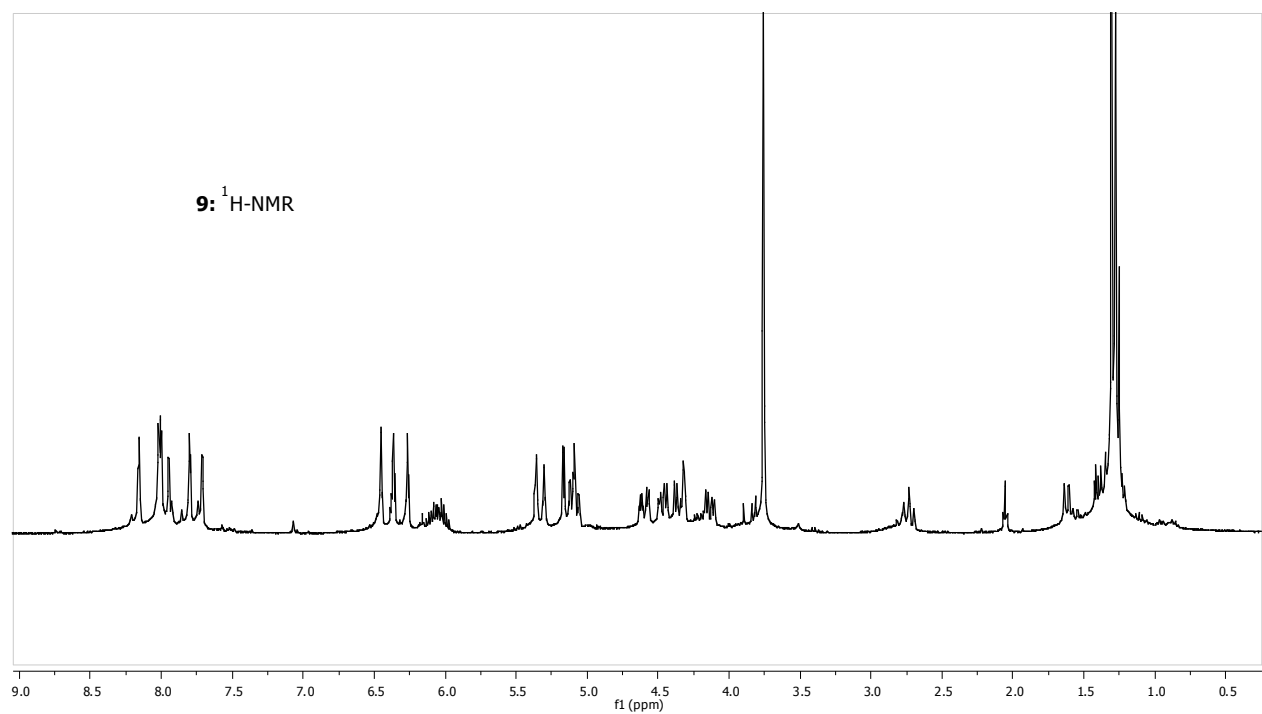

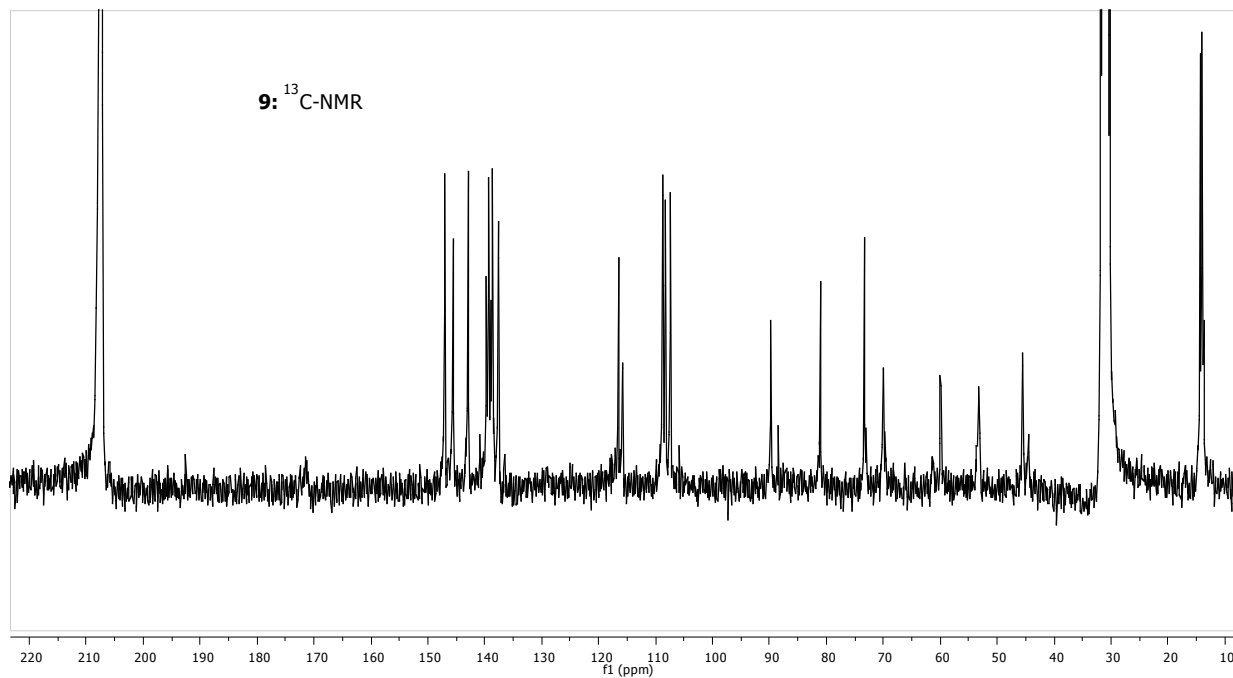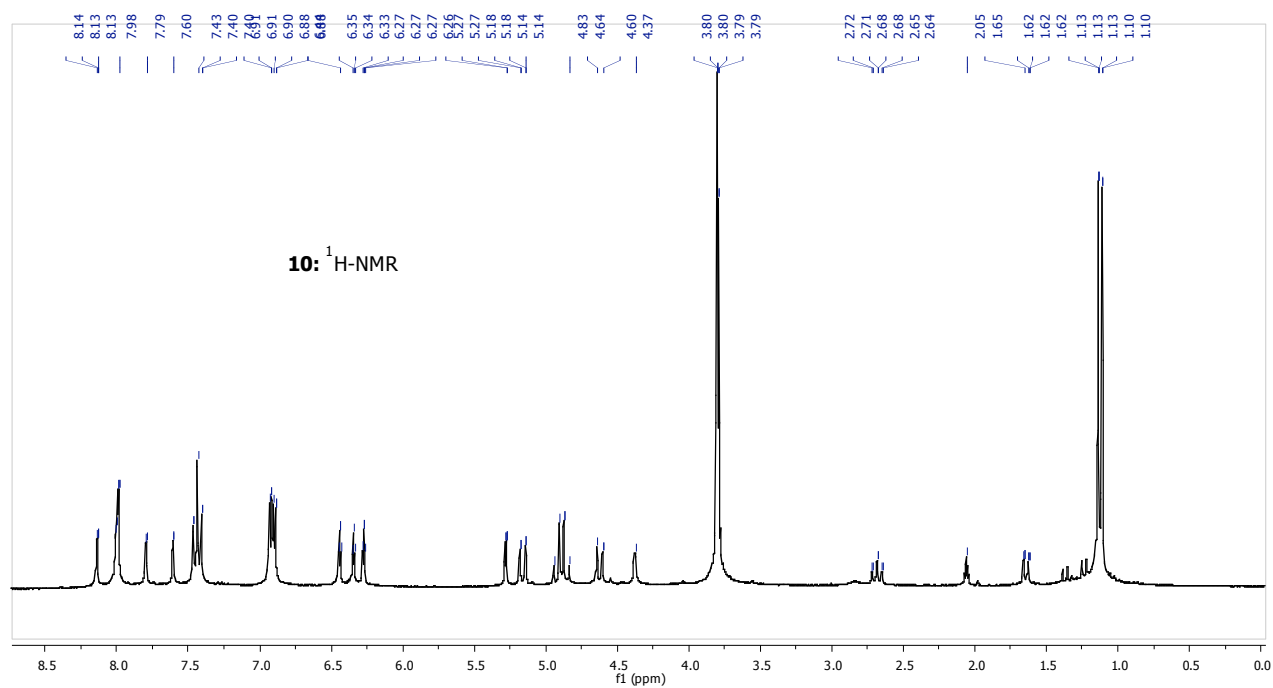

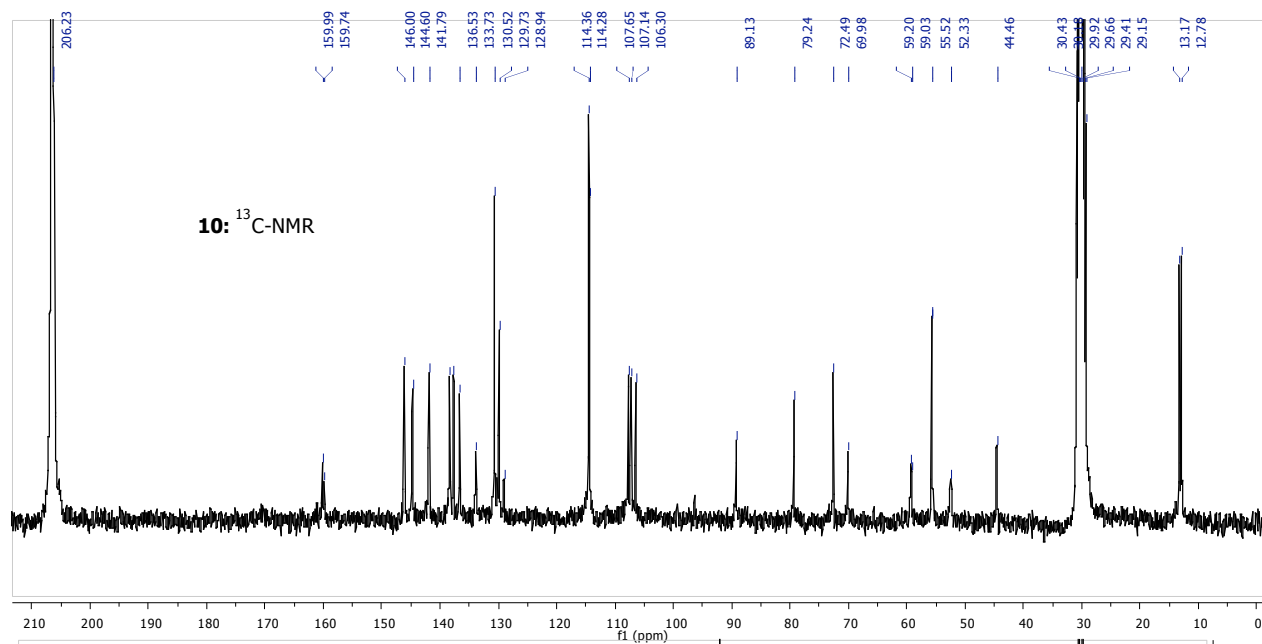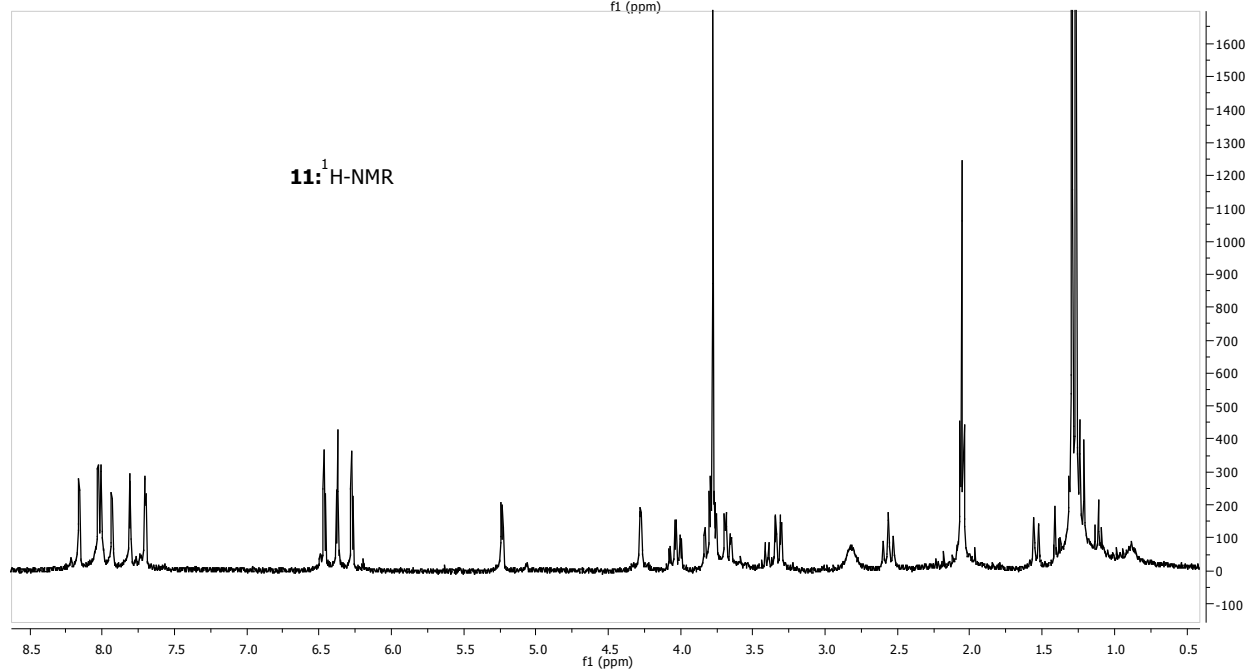

**11:**  $^{13}\text{C}$ -NMR

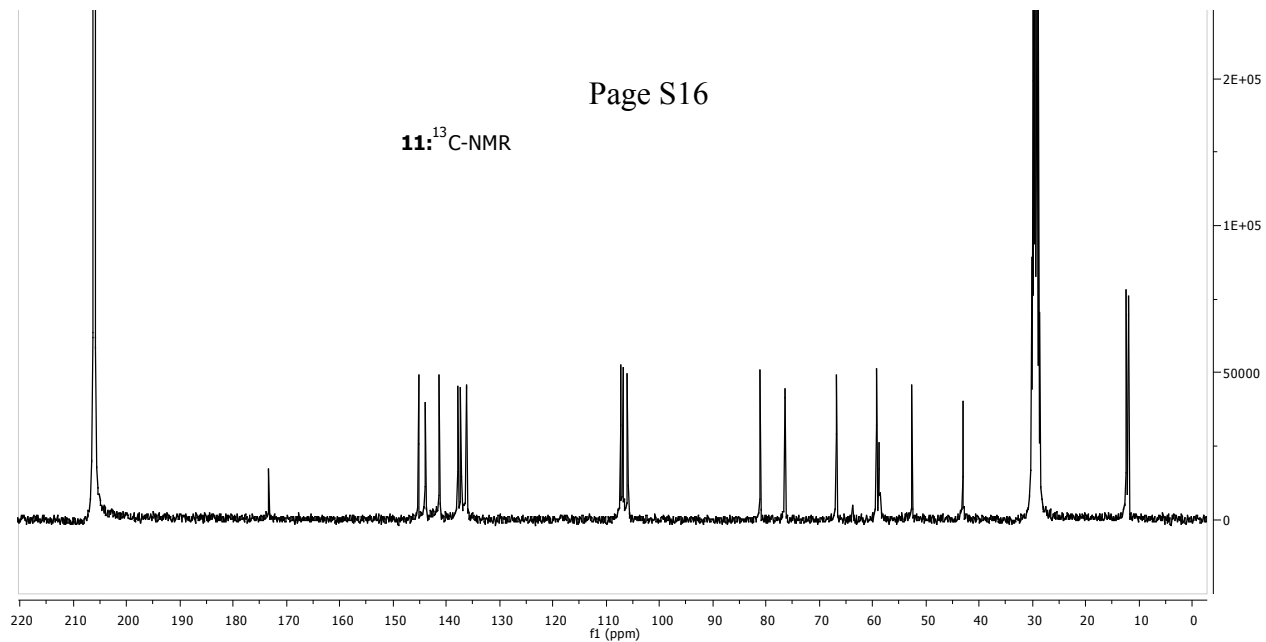

**12:**  $^1\text{H}$ -NMR

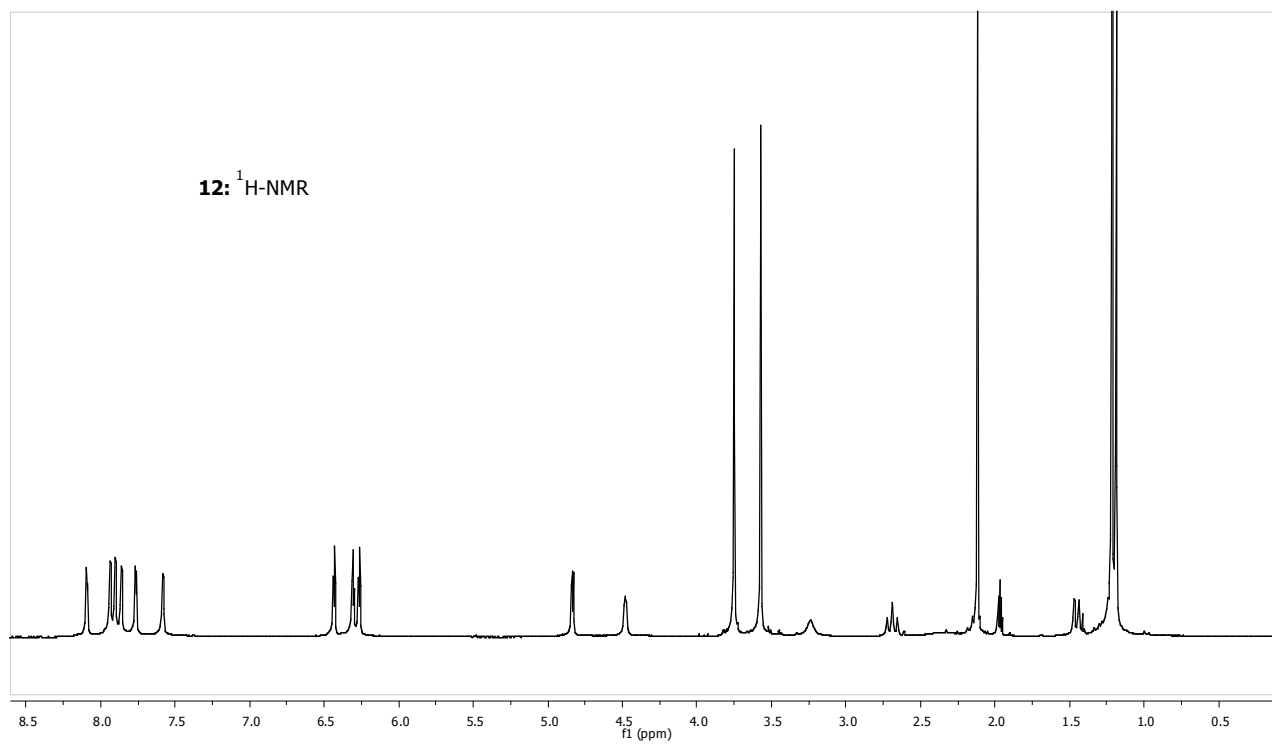



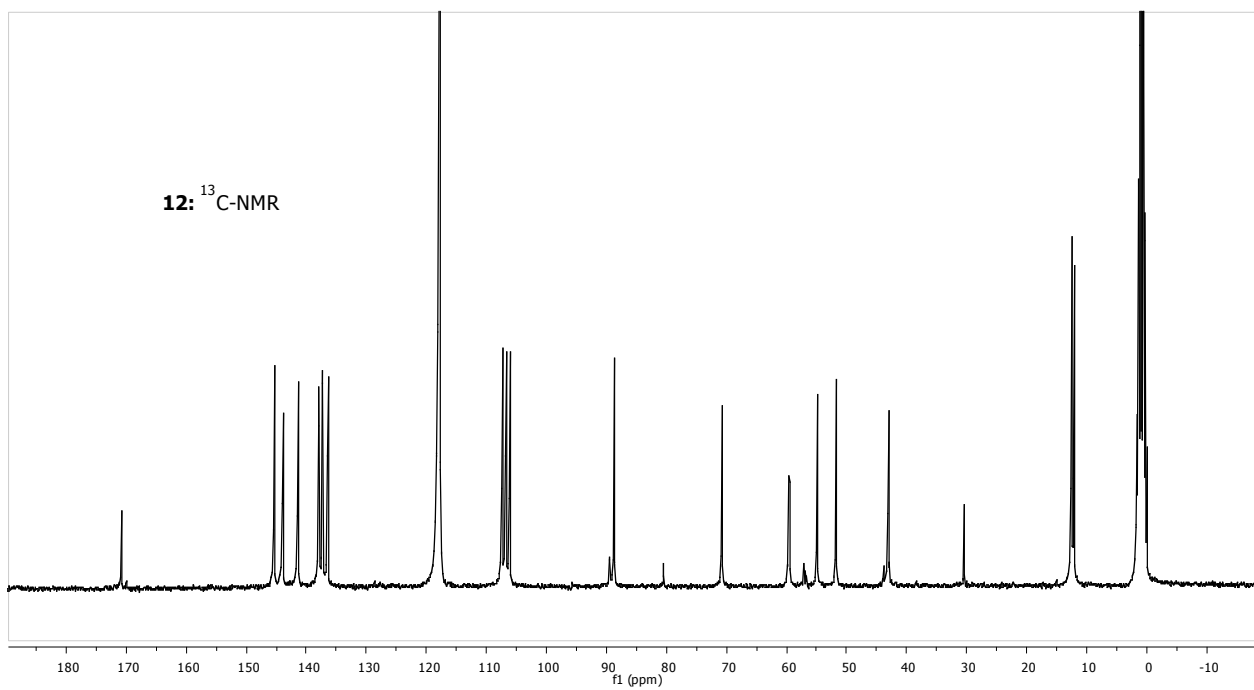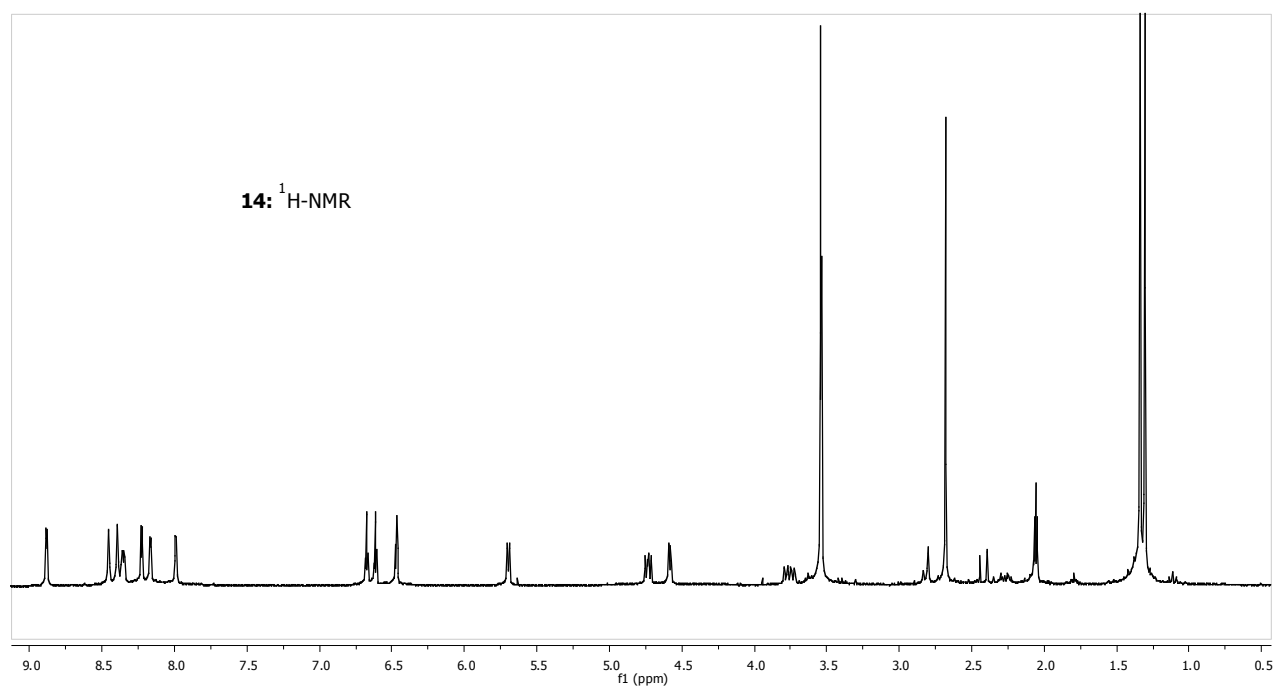

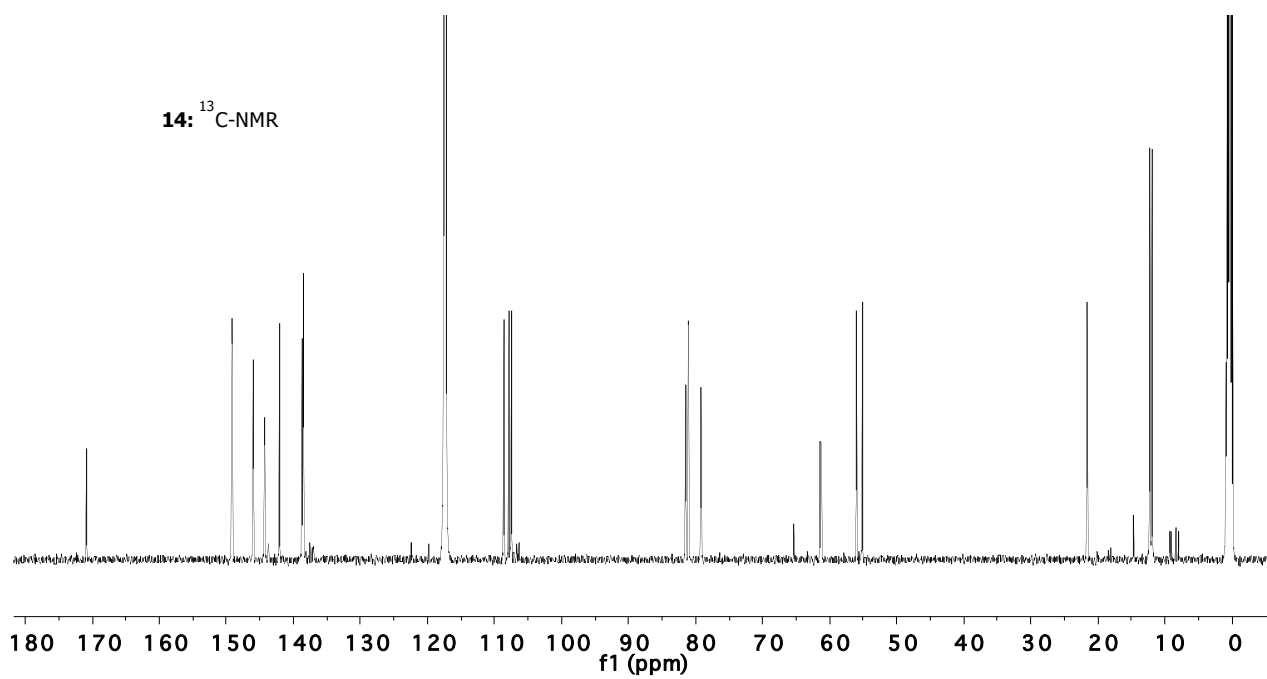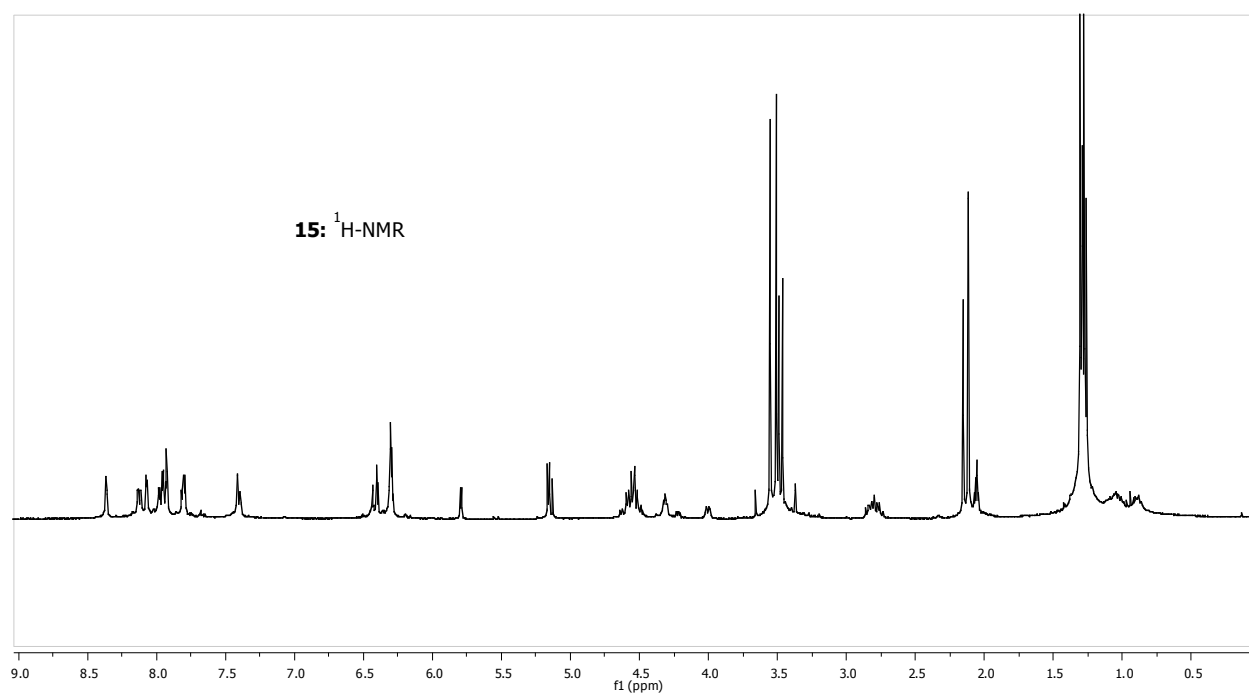

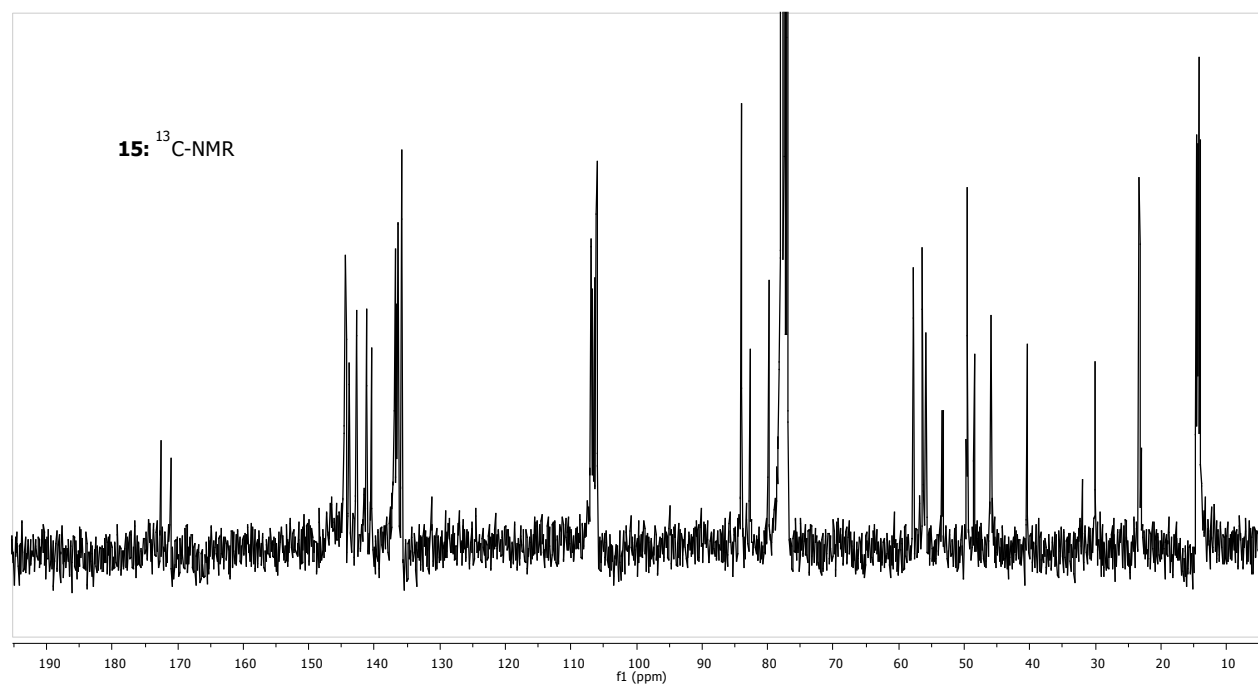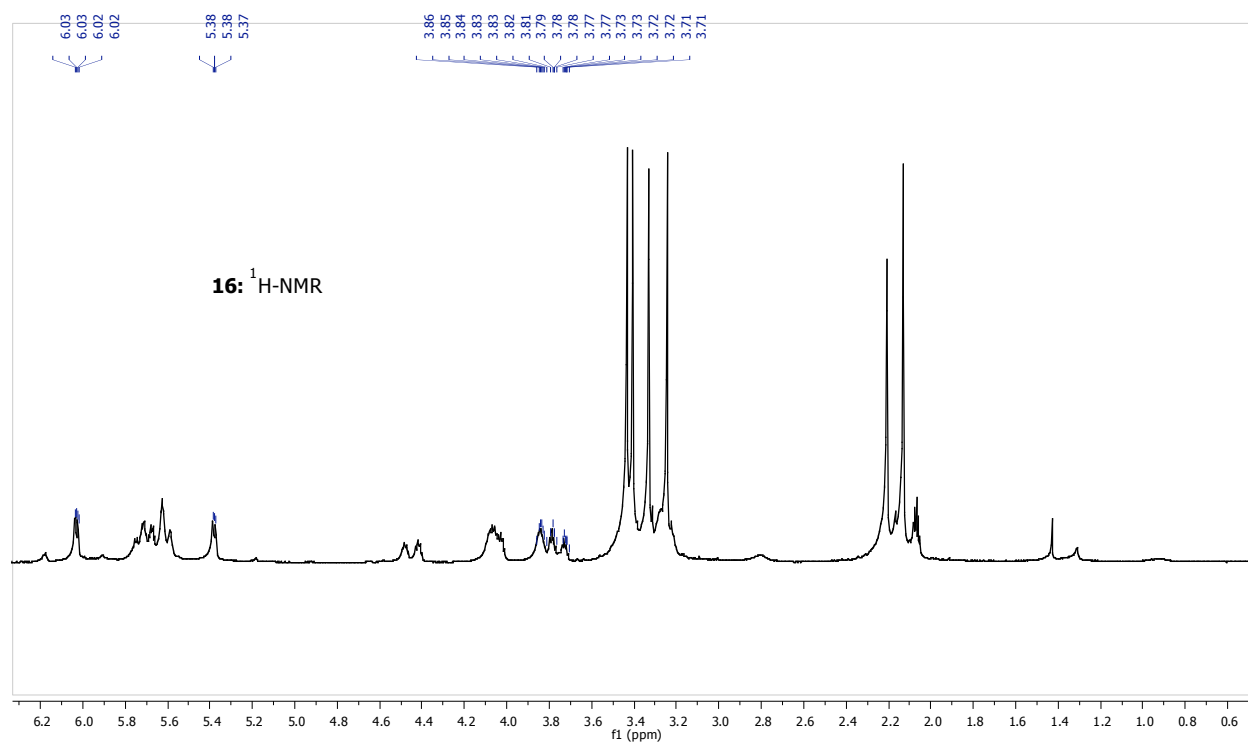

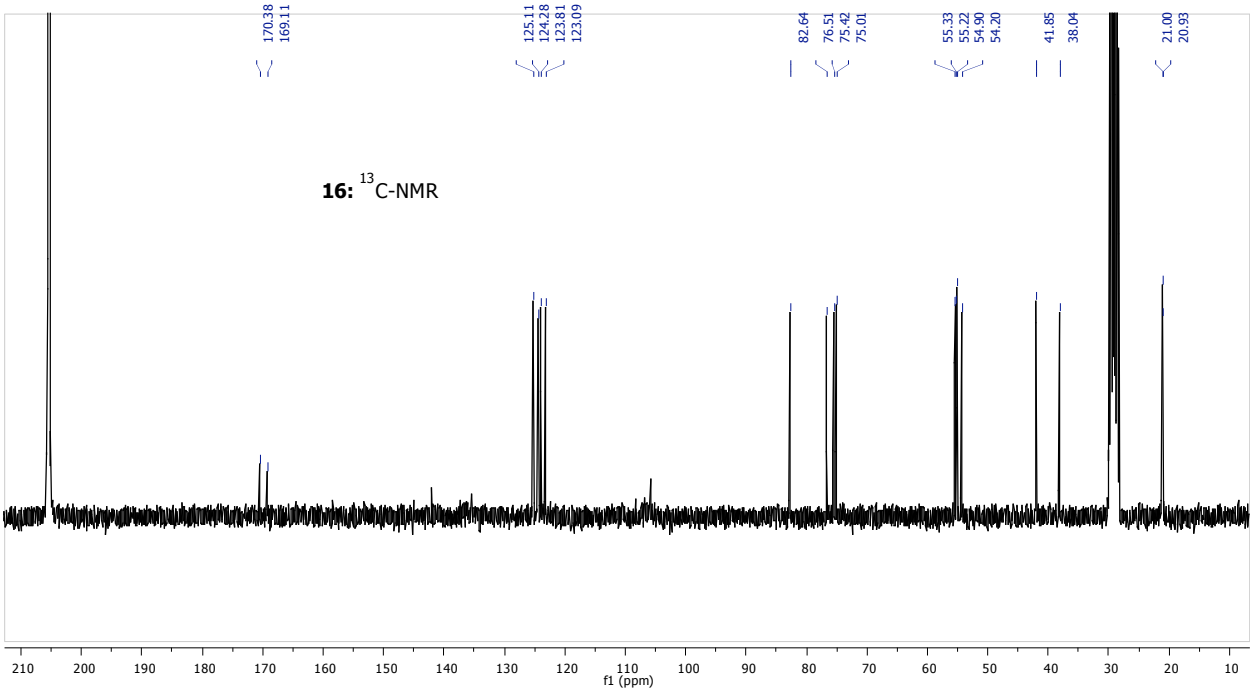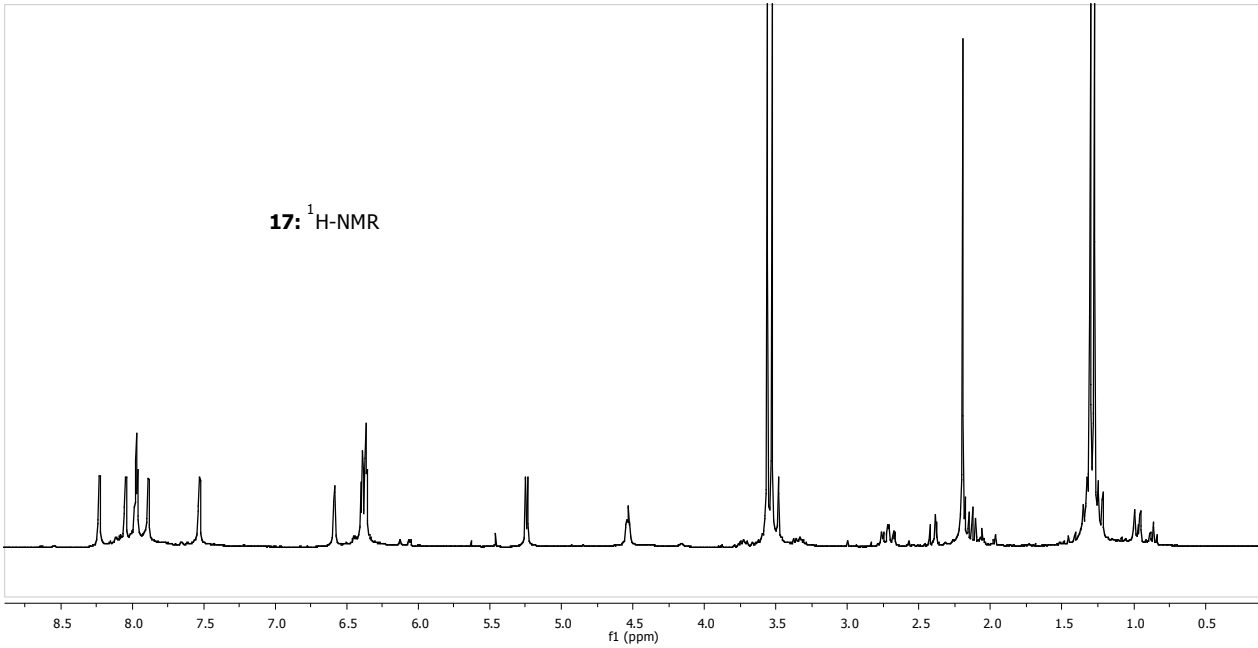

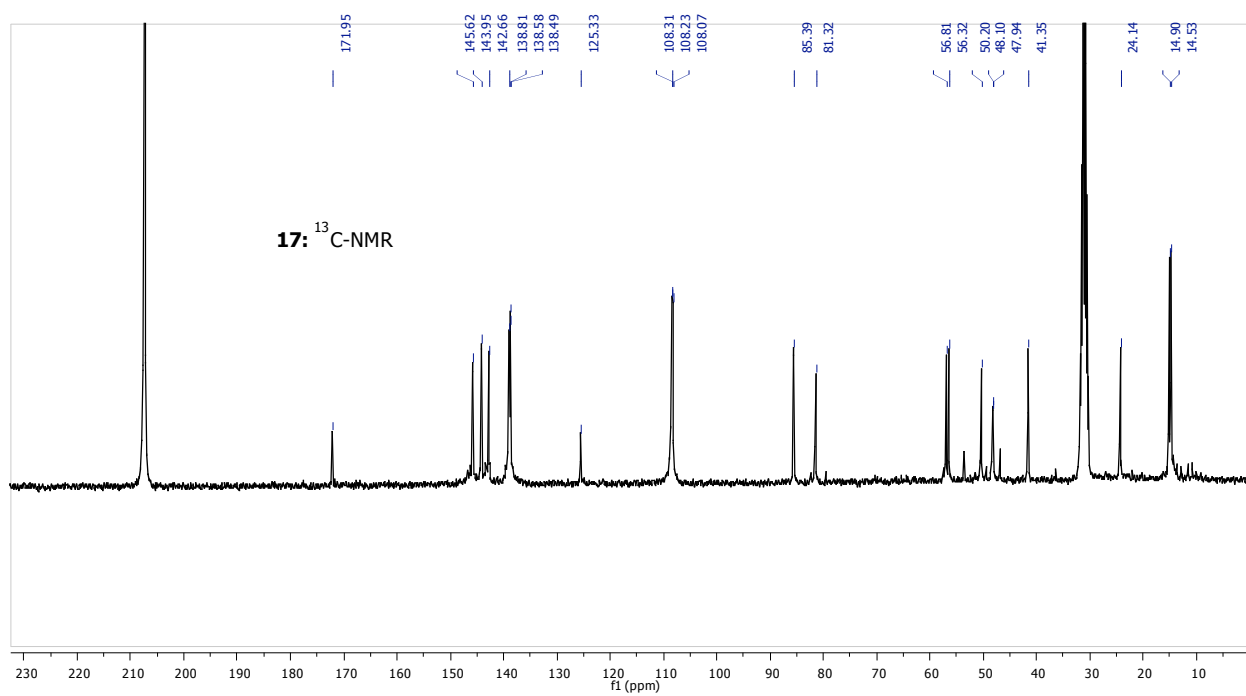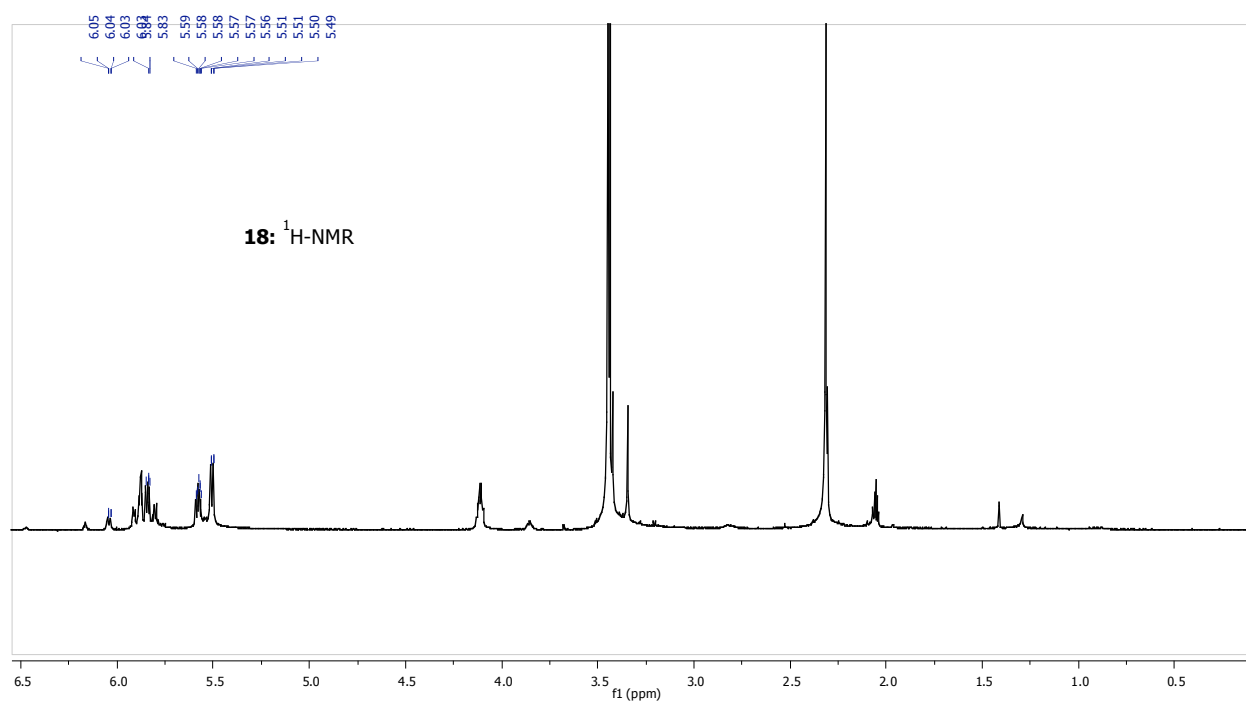

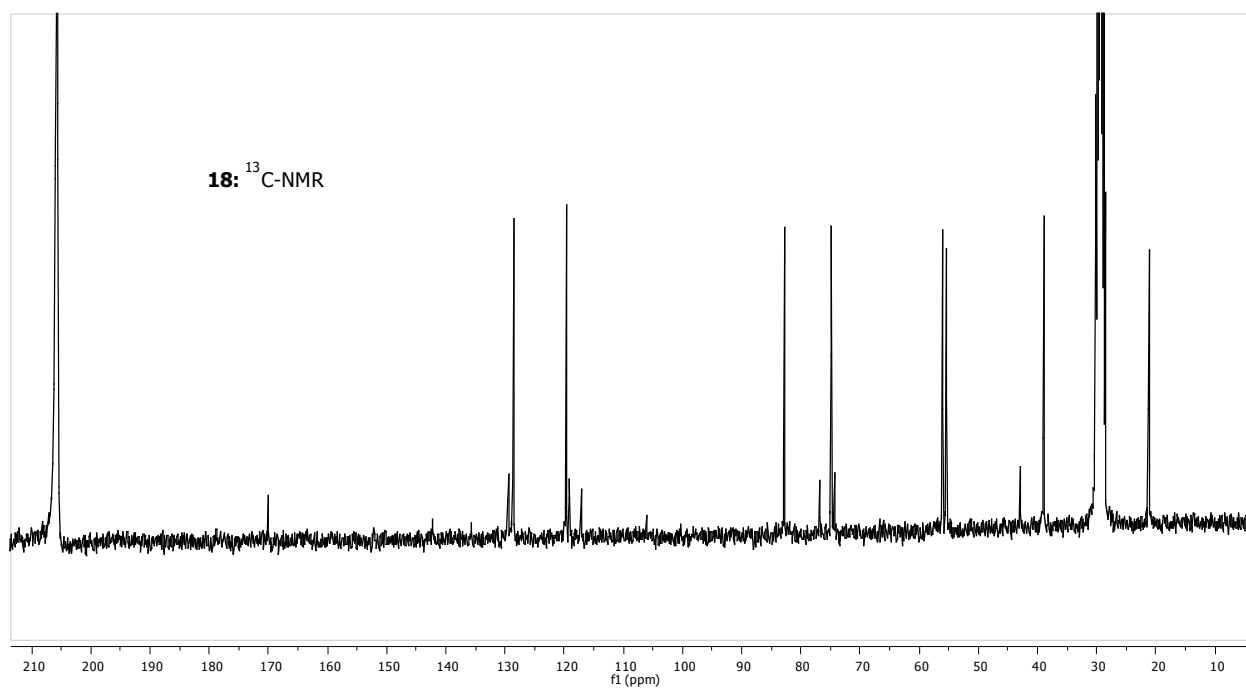

Supplement: Supplementary file 1 [file 4581379]
